# Supplementary material
Source: PubMed Central journal article supplement (PMC2075137)
Supplement: jphysiol_2006.121475_1.pdf [file jphysiol_2006.121475_1.pdf]

# ***ONLINE SUPPLEMENT***

## **EXPERIMENTAL METHODS**

### ***Experimental animals:***

Details on the production of transgenic (TG) mice overexpressing a WT (WT) Kir2.1 subunit and a green fluorescent protein (GFP) fusion protein are presented by Li et al.<sup>1</sup> All animals used in this study were from line 1, 3<sup>rd</sup> and 4<sup>th</sup> generation, and included a total of 21 transgenic (TG) and 12 of the wild-type littermates (WT). The mice were used as follows:

**WT:** 4 for analysis of arrhythmia duration and frequency, 6 for hypertrophy assessment (3 of which were used for the slot blot) and 2 for western blotting.

**TG:** 8 for analysis of arrhythmia duration and frequency, 6 for hypertrophy assessment (3 of which were used for the slot blot), 5 for the Ba<sup>2+</sup> experiments and 2 for western blotting.

### ***Western Blot:***

For western blotting of Kir2.1, membrane fractions from hearts of 2 TG and 2 WT mice were prepared as described elsewhere.<sup>2</sup> Equal amounts of total protein were subjected to western blot analysis. The expression of the endogenous Kir2.1 and the Kir2.1-GFP fusion protein was probed using anti-Kir2.1 (Alomone Labs) antibody.

### ***Time space plots (TSP) and measurement of the core diameter:***

For 2 rotation of the spiral wave, a vertical TSP was constructed and the core diameter measured as detailed earlier (see also description of Figure 16 below).<sup>3,4</sup> Time is on the X axis; the Y direction represents the vertical distance. For simulations, the vertical space aspect of the TSP represents 2 cm, and for experiments it represents 7mm.

## **SUPPLEMENTAL EXPERIMENTAL RESULTS**

### ***I<sub>K1</sub> is functionally upregulated in TG mice hearts.***

Li et al<sup>1</sup> observed by immunofluorescence localization of GFP that the  $\alpha$ -MHC-driven expression of Kir2.1 subunits was widespread and nearly uniform in both left and right ventricles in the TG mouse used in this study. However, they did not study the Kir2.1 protein levels in the WT vs TG hearts. In figure 1, we present results of our western blot analysis in such hearts. Membrane fractions from 2 WT and 2 TG hearts were prepared and probed with anti-Kir2.1 antibodies. In both, WT and TG lanes, a band at around 47 kDa is evident in the WT and TG cases. This corresponds to the native Kir2.1 protein. The equal intensity of the bands demonstrates equal loading of the samples. However, a higher band at about 70 kDa is prominent only in the TG lane, corresponding to the molecular weight of the Kir2.1-GFP chimera. This indicates that the protein product of the Kir2.1-GFP transgene is expressed in the hearts of TG mice.

## **COMPUTATIONAL METHODS**

### **Development of the Single Cell Mouse Ventricular Model at 37 °C**

Our goal in this study was twofold: 1. To develop a new, simplified, single-cell model of the mouse ventricular action potential at physiological temperatures (37 °C), with only Hodgkin-Huxley-type descriptors for the various ionic currents, and keep the intracellular ionic concentrations constant. 2. To incorporate this single cell model into an isotropic, uniform, two-dimensional (2-D) sheet of cardiac cells to simulate the fast rotor activity observed on the mouse epicardial surface.

The mouse ventricular cell model was developed based on semi-quantitative experimental data in mouse ventricular myocytes, and equations were adapted from earlier murine models.<sup>5,6</sup> The mouse model includes descriptors for the following ionic mechanisms that have been deemed to contribute to the genesis of the cardiac action potential: a fast inward  $\text{Na}^+$  current ( $I_{\text{Na}}$ ); the L-type  $\text{Ca}^{2+}$  current ( $I_{\text{CaL}}$ ); the  $\text{Ca}^{2+}$ -independent transient outward  $\text{K}^+$  current ( $I_{\text{to}}$ ); the slowly inactivating, 4-AP sensitive delayed rectifier  $\text{K}^+$  current ( $I_{\text{Kslow}}$ ); the steady-state outward  $\text{K}^+$  current ( $I_{\text{ss}}$ ); an inwardly rectifying  $\text{K}^+$  current ( $I_{\text{K1}}$ ); a background current ( $I_{\text{B}}$ ) consisting of three components [a  $\text{Na}^+$  ( $I_{\text{BNa}}$ ), a  $\text{Ca}^{2+}$  ( $I_{\text{BCa}}$ ) and a  $\text{K}^+$  ( $I_{\text{BK}}$ ) background current]; a  $\text{Na}^+$ - $\text{K}^+$  pump current ( $I_{\text{NaK}}$ ); a  $\text{Ca}^{2+}$  pump current ( $I_{\text{CaP}}$ ); and a  $\text{Na}^+$ - $\text{Ca}^{2+}$  exchanger current ( $I_{\text{NaCa}}$ ). A more detailed description for each ionic mechanism is provided below.

### ***$\text{Na}^+$ Current ( $I_{\text{Na}}$ )***

The equation for  $I_{\text{Na}}$  consists of a fast activation variable ( $m^3$ ), a fast inactivation variable ( $h$ ), and a slow inactivation variable ( $j$ ), similar to earlier ventricular models.<sup>5,7</sup> The steady-state activation and inactivation characteristics of  $I_{\text{Na}}$  were based on an earlier description in the rat model,<sup>5</sup> whereas the kinetics of the sodium current were adapted from the guinea-pig ventricular cell model.<sup>7</sup> The maximum conductance value of  $I_{\text{Na}}$  was chosen such that the CV of the cardiac wavefront in the two dimensional sheet of cardiac cells was  $\approx 55.6$  cm/sec, which is in accordance with our experimental measurements in WT mice, viz.  $61 \pm 9$  cm/sec.

### ***L-type $\text{Ca}^{2+}$ Current ( $I_{\text{CaL}}$ )***

The formulation for  $I_{CaL}$  is identical to an earlier equation in a rat model,<sup>5</sup> except that the activation/inactivation kinetics were scaled from room temperature to physiological temperature, assuming a  $Q_{10}$  value of 2.1, based on a recent study.<sup>8</sup> In the new mouse model, for purposes of simplicity, there is no formulation of a sub-space calcium concentration, and even the “global” intracellular calcium concentration is clamped to a fixed value of 150 nM. Thus, there is no  $Ca^{2+}$ -dependent inactivation of  $I_{CaL}$  in this version of the model.

### ***Ca<sup>2+</sup>-independent Transient Outward K<sup>+</sup> Current ( $I_{to}$ )***

We first formulated model equations for  $I_{to}$  at room temperature, which included a rapid activation and an inactivation gates. The half-maximum voltages of the steady-state activation ( $V_{1/2,act}$ ) and inactivation ( $V_{1/2,inact}$ ) for  $I_{to}$  in the mouse model were  $-25.0$  mV and  $-55.8$  mV respectively, based on experimental measurements.<sup>9,10</sup> Note that the  $V_{1/2,act}$  value was based on measurements made for  $I_{Kslow}$  in mouse ventricular myocytes.<sup>9</sup> This is because (i) there are no independent measurements for the steady-state activation characteristics of  $I_{to}$  in mouse, and (ii) based on their experimental current-voltage (I-V) characteristics,  $I_{to}$  and  $I_{Kslow}$  are deemed to display similar, but not identical voltage dependence of activation.<sup>10,11</sup> The experimental  $V_{1/2,act}$  value was  $-12.5 \pm 2.6$  mV,<sup>9</sup> but was shifted by  $-12.5$  mV as it was measured in the presence of 2 mM  $CoCl_2$ ,<sup>9</sup> since it is now known that divalent cations shift the steady-state activation/inactivation characteristics of  $I_{to}$ .<sup>12</sup> In contrast, the  $V_{1/2,inact}$  value was based on experimentally obtained values of  $-55.8 \pm 1.3$  mV, recorded in the absence of divalent cations.<sup>10</sup> The time constant for activation of  $I_{to}$  was based on an equation in the recently published mouse model,<sup>6</sup> its magnitude was reduced by 25% so that its values were similar to those

seen experimentally.<sup>10</sup> The equation describing the time constant for inactivation was chosen such that it was independent of membrane voltage at depolarized potentials, in accordance with recent experiments,<sup>11</sup> and its value was  $\approx 30$  msec, as seen experimentally.<sup>10</sup> In addition, this time constant had a bell-shaped curve at hyperpolarized potentials, so that recovery from inactivation was progressively faster at more hyperpolarized potentials, in accordance with experimental results.<sup>10</sup> Initially, the maximum conductance value of  $I_{t0}$  was chosen such that its peak current density at a clamp potential of +30 mV (from a holding potential of -80 mV) was 34.68 pA/pF, which is comparable to experimentally recorded values of  $34.5 \pm 2.6$  pA/pF at 22 °C.<sup>10</sup> In Figure 2, we present the steady-state activation/inactivation characteristics (A), the time constants for activation/inactivation (B), the time-dependent currents activated in response to voltage-clamp pulses (C), and the peak I-V relationship for  $I_{t0}$  at room temperature (D).

Next, we modified the equations describing  $I_{t0}$  for 37 °C in the following manner: The steady-state activation/inactivation characteristics were assumed to be similar at 22 °C and 37 °C. The time constants for activation and inactivation were scaled by a factor of 2.66, which was obtained by calculating  $Q_{10}$  values, by comparing reactivation kinetics of  $I_{t0}$  at -80 mV for 22 °C and 32 °C.<sup>10</sup> The current density of  $I_{t0}$  was reported to be  $\approx 45$  pA/pF at 32 °C, compared to  $\approx 35$  pA/pF at 22 °C;<sup>10</sup> this represents an increase of  $\approx 1$  pA/pF per °C. Therefore, we assumed the current density of  $I_{t0}$  at 37 °C to be  $\approx 50$  pA/pF at +30 mV, and the maximum conductance value of  $I_{t0}$  was adjusted accordingly. In Panels E and F of Figure 2 are shown the simulated time-dependent currents activated in

response to voltage-clamp pulses from a holding potential of  $-80$  mV (E), and the I-V relationship for  $I_{t0}$  at  $37$  °C (F).

### ***Delayed rectifier $K^+$ current ( $I_{Kslow}$ )***

The 4-AP sensitive delayed rectifier  $K^+$  current  $I_{Kslow}$  has also been referred to as  $I_{sus}$ ,<sup>13</sup>  $I_{Kur}$ ,<sup>14</sup> and  $I_{slow}$ .<sup>9</sup>  $I_{Kslow}$  activates rapidly, but declines much more slowly or  $\approx 20$  times more slowly than  $I_{t0}$  in response to depolarized voltage-clamp pulses. Furthermore, recent reports indicate that  $I_{Kslow}$  can be further classified into two components,  $I_{Kslow1}$  and  $I_{Kslow2}$ , based on their biophysical properties/molecular correlates.<sup>15,16</sup> However, we have formulated equations for  $I_{Kslow}$  only, in this version of our mouse model. The values of  $V_{1/2,act}$ , and  $V_{1/2,inact}$  were  $-12.5$  mV and  $-44.7$  mV respectively (Figure 3A). These were based on experimental measurements of  $-12.5 \pm 2.6$  mV for activation,<sup>9</sup> and  $-44.7 \pm 1.7$  mV for inactivation.<sup>10</sup> The time constant for activation of  $I_{Kslow}$  was formulated to be a bell-shaped curve (Figure 3B), so that its values were similar to those observed experimentally at depolarized potentials.<sup>10</sup> For comparison, we also show the activation time constant from a recently published mouse ventricular cell model;<sup>6</sup> the values are similar to those used in our model at depolarized potentials. However, they tend toward infinity at more hyperpolarized potentials; hence the equation from the published mouse model was not used. The time constant for inactivation of  $I_{Kslow}$  shows a characteristic similar to that of  $I_{t0}$ , that of being relatively independent of membrane voltage at depolarized potentials, and having a bell-shaped curve at more hyperpolarized potentials. However, the absolute values are much higher than that of  $I_{t0}$ . For example, the time constant for inactivation was  $\approx 1.1$  seconds at depolarized potentials (compared to 30 msec for  $I_{t0}$ ), and the recovery at  $-80$  mV was  $\approx 740$  msec (compared to  $\approx 35$  msec for

$I_{to}$ ). The inactivation curve and corresponding experimental data<sup>10</sup> are shown in Figure 3B. The maximum conductance value of  $I_{K_{slow}}$  at 22 °C was chosen such that the peak density of the depolarization activated  $I_{K_{slow}}$  at a clamp potential of +30 mV (from a holding potential of -80 mV) was 34.3 pA/pF, which is comparable to experimentally recorded values of  $34.2 \pm 3.5$  pA/pF.<sup>10</sup> The time-dependent currents activated in response to voltage-clamp pulses from a holding potential of -80 mV, and the peak I-V relationship for  $I_{K_{slow}}$  at 22 °C are shown in Figure 3C and 3D respectively.

We then modified the equations representing  $I_{K_{slow}}$  for 37 °C in a manner similar to that previously shown for  $I_{to}$ . The steady-state activation/inactivation characteristics were assumed to be similar at 22 °C and 37 °C. The time constants for activation and inactivation were scaled by a factor of 2.18, which was obtained by calculating  $Q_{10}$  values, by comparing reactivation kinetics of  $I_{K_{slow}}$  at -80 mV for 22 °C and 32 °C.<sup>10</sup> The current density of  $I_{K_{slow}}$  was reported to be  $\approx 45$  pA/pF at 32 °C, compared to  $\approx 35$  pA/pF at 22 °C;<sup>10</sup> this again represents an increase of  $\approx 1$  pA/pF per °C. Therefore, we assumed the current density of  $I_{K_{slow}}$  at 37 °C to be  $\approx 50$  pA/pF at +30 mV, and the maximum conductance value of  $I_{K_{slow}}$  was adjusted accordingly. Panels E and F of Figure 3 show the simulated time-dependent currents activated in response to voltage-clamp pulses from a holding potential of -80 mV, and the I-V relationship for  $I_{K_{slow}}$  at 37 °C.

### ***Steady-state Outward $K^+$ current ( $I_{ss}$ )***

$I_{ss}$  in mouse ventricular myocytes has been modeled to activate slowly, but does not decay or inactivate. The value of  $V_{1/2,act}$  (Figure 4A) was chosen to be 0 mV, which was  $\approx 12$  mV depolarized from the corresponding value of  $I_{K_{slow}}$ , based on the

experimental observation that the activation of I-V curve for  $I_{ss}$  occurs at more depolarized potentials compared to  $I_{Kslow}$ .<sup>10</sup> The time constant for activation of  $I_{ss}$  was again formulated to be a bell-shaped curve (Figure 4B), and its values were similar to those observed experimentally at depolarized potentials.<sup>10</sup> The activation time constant from a recently published mouse ventricular cell model<sup>6</sup> is also shown for comparison in red; the values are similar to those used in our model at depolarized potentials. However, again as observed previously for  $I_{Kslow}$ , they tend toward infinity at more hyperpolarized potentials; hence the equation from the published mouse model was not used. The maximum conductance value of  $I_{ss}$  at 22 °C was chosen such that the peak density of the depolarization activated  $I_{ss}$  at a clamp potential of +30 mV (from a holding potential of –80 mV) was 15.34 pA/pF, which is comparable to experimentally recorded values of  $15.6 \pm 1.6$  pA/pF.<sup>10</sup> Figure 4C and D show, respectively, the time-dependent currents activated in response to voltage-clamp pulses from a holding potential of –80 mV, and the peak I-V relationship for  $I_{ss}$  at 22 °C.

Next, we modified the  $I_{ss}$  equations for 37 °C in a manner similar to that previously described for  $I_{to}$  and  $I_{Kslow}$ . The steady-state activation characteristic was assumed to be similar at 22 °C and 37 °C. The time constant for activation was scaled by a factor of 2.18, and assumed to be similar to that of  $I_{Kslow}$ , since no corresponding experimental values are available for  $I_{ss}$ . The current density of  $I_{ss}$  was reported to be  $\approx 25$  pA/pF at 32 °C, compared to  $\approx 15$  pA/pF at 22 °C;<sup>10</sup> this again represents an increase of  $\approx 1$  pA/pF per °C. Therefore, we assumed the current density of  $I_{ss}$  at 37 °C to be  $\approx 30$  pA/pF, and the maximum conductance value of  $I_{ss}$  was adjusted accordingly. In Figure 4, Panels A and F show, respectively, the simulated time-dependent currents activated in



response to voltage-clamp pulses from a holding potential of  $-80$  mV, and the peak I-V relationship for  $I_{ss}$  at  $37$  °C.

### ***Inward Rectifier $K^+$ Current ( $I_{K1}$ )***

The equation for  $I_{K1}$  was based upon a recent update in the formulation for the rat ventricular model.<sup>17</sup> This equation incorporates the characteristic square-root dependence of the maximum conductance value of  $I_{K1}$  on external  $K^+$  ions ( $[K^+]_o$ ), which was missing in the original rat model.<sup>5</sup> The maximum conductance value of  $I_{K1}$  was adjusted so that the peak value of outward  $I_{K1}$  current at  $-60$  mV was  $0.68$  pA/pF, which is comparable to the experimental values of  $0.68 \pm 0.1$  pA/pF recorded in mouse ventricular myocytes.<sup>1</sup> To simulate the  $I_{K1}$  current in TG mice overexpressing Kir2.1, the maximum conductance value was multiplied by  $12.0$ , since the ratio of the maximum outward currents at  $-60$  mV between TG and wild-type mice was  $12.23$ .<sup>1</sup> Figure 5 displays the I-V characteristics for  $I_{K1}$  in the WT (WT) and TG (TG) mice.

### ***Other Currents and Model Ionic Concentrations***

The formulations for the other currents including the background current ( $I_B$ ),  $Na^+$ - $K^+$  pump current ( $I_{NaK}$ ), the  $Ca^{2+}$  pump current ( $I_{CaP}$ ), and the  $Na^+$ - $Ca^{2+}$  exchanger current ( $I_{NaCa}$ ), were similar to earlier formulations in the rat ventricular model.<sup>5</sup> As stated earlier, the intracellular  $Ca^{2+}$  concentration was fixed to  $150$  nM, and the internal  $K^+$  concentration was fixed to  $140$  mM. The internal sodium concentration was fixed at  $16.0$  mM, based on experimental measurements of  $16.9 \pm 1.4$  mM intracellular sodium ions in rats at  $6.0$  Hz stimulation frequency.<sup>18</sup> The external concentrations of  $Na^+$ ,  $K^+$ , and  $Ca^{2+}$

ions were fixed at 156.0 mM, 4.0 mM, and 1.8 mM, respectively, based on Tyrode's solution used during experiments in the present study.

### **Computational Methods for the Single Cell Model**

The mathematical model of the mouse ventricular myocyte was implemented in "C" language on a 32 processor, parallel computer (MicroArray cluster machine). The differential equations in this model were solved using a fixed time step ( $\Delta t = 0.005$  msec), modified Euler method, as in an earlier study.<sup>19</sup> The steady-state cardiac action potentials were obtained by pacing the ionic model for 10 seconds at 1 Hz (after making a parameter change).

### **Computational Methods for Two-dimensional (2D) Model**

The propagation of the cardiac impulse was simulated in a two-dimensional (2D), homogeneous, isotropic tissue of  $2 \times 2 \text{ cm}^2$ , consisting of  $200 \times 200$  nodes (ventricular cells), and no-flux boundary conditions at the edges (We could induce sustained reentry in a smaller sheet of  $1 \times 1 \text{ cm}^2$  only in the TG case, and the frequency characteristics in both areas were identical). We used the Euler method to integrate the voltage at each node, which was governed by the conventional reaction-diffusion equation, assuming uniform, isotropic tissue, as in a recent study.<sup>19</sup> The 2D simulations were coded in "C", and solved on a 32-processor, parallel computer (MicroArray cluster machine). Rotors were initiated by the standard cross-field stimulation protocol. The results for the rotor dynamics are discussed in the Main manuscript.

## **SUPPLEMENTAL SIMULATION RESULTS**

### ***Single Cell Model***

In Figure 6 we present the simulated mouse ventricular action potential under control conditions (37 °C) elicited by a stimulus current of 1.4 nA applied for 3 msec at a frequency of 1Hz. It was qualitatively similar to an experimentally recorded action potential at 1 Hz and at 35 °C,<sup>16</sup> shown in the inset. Both action potentials show a rapid repolarization initially, followed by a late, slower phase of repolarization. It is important to note that the slower late phase of repolarization is seen despite the absence of a  $\text{Ca}^{2+}$  transient in the model, as well as in the experiments, where EGTA was used in the recording pipette.<sup>16</sup> The rapid repolarization or the triangular nature of the action potential is mainly seen to be due to the interaction of  $I_{\text{CaL}}$ ,  $I_{\text{to}}$  and  $I_{\text{Kslow}}$ , whereas  $I_{\text{ss}}$  plays a relatively minor role (see Figure 5A in the main manuscript for more detailed description). The main repolarizing current in the late phase of repolarization is  $I_{\text{K1}}$ , which counteracts other ionic currents such as the electrogenic  $\text{Na}^+$ - $\text{Ca}^{2+}$  exchanger and the background current ( $I_{\text{B}}$ ), to bring about the action potential back to its resting potential (see Figure 7, which depicts currents  $I_{\text{K1}}$ ,  $I_{\text{B}}$ ,  $I_{\text{NaCa}}$ , and  $I_{\text{NaK}}$  underlying the action potential. The  $\text{Ca}^{2+}$  pump current  $I_{\text{CaP}}$  was  $\approx 1$  pA, and hence is not shown).

To validate the new mouse model, we investigated various aspects of its repolarization properties, and compared them to experimental results whenever possible. In Figure 8, the simulated action potentials at 1 and 10 Hz are seen to be very similar, and thus show little or no rate-dependence; this is qualitatively similar to experimental results,<sup>20</sup> digitized in the inset of Figure 8. The simulated action potential when  $I_{\text{Kslow}}$  was reduced to 20% of its original value is shown in Figure 9; it is qualitatively similar to

that seen experimentally for the mouse cardiac action potential<sup>9</sup> in the presence of 50  $\mu$ M 4-AP (shown in inset at 35 °C), which has been shown to  $\approx$  block 80% of  $I_{K_{slow}}$ .<sup>20</sup> Next, we investigated the effect of completely blocking  $I_{to}$  on the simulated action potential, as shown in the topmost panel of Figure 10. The action potential was more prolonged at the early phase, compared to the later one. We compared this to experimental results, which are digitized and shown in the middle panel in Figure 10. The recordings in these experiments were made at room temperature, and show action potentials and corresponding currents recorded from the same respective myocytes from either wild-type or TG mice that were generated to express a dominant-negative N-terminal fragment of the K(v)4.2 pore-forming potassium channel subunit (that encodes for  $I_{to}$ ) under the control of the alpha-myosin heavy chain promoter.<sup>21</sup> The action potential from the Kv4.2N TG mouse is prolonged at both early and late repolarization phases. Experimentally,  $I_{to}$  is absent in Kv4.2N mice, although there was no statistical difference in the currents measured at the end of a 500 msec depolarizing voltage clamp pulse. Even then, the mean current density was  $\approx$  20% smaller in Kv4.2N compared to controls, and this can also be seen clearly in the middle panel in Figure 10, where the magnitude of the currents in the two experimental recordings is different. The currents that remain at the end of a 500 msec depolarizing pulse include  $I_{K_{slow}}$  and  $I_{ss}$ .<sup>10</sup> Therefore, we simulated action potentials by blocking  $I_{to}$  completely, and reducing both  $I_{K_{slow}}$  and  $I_{ss}$  densities by 25%; now the simulated action potential prolongation was qualitatively more similar (bottom panel, Figure 10) to that observed experimentally (Also, again note that there is a temperature difference; the simulations were carried out at 37 °C, whereas experiments were done at 22 °C). Figure 11, shows the simulated action potentials in WT and Kir2.1

overexpressing mice (where  $I_{K1}$  conductance was increased 12.0 fold, and  $I_{ss}$  density was multiplied by 1.36, based on experiments<sup>1</sup>), which are qualitatively similar to experimentally recorded monophasic action potentials.<sup>1</sup> On blocking  $I_{ss}$ , the action potential in our model showed a prolongation, mainly at the terminal phase of repolarization (Figure 12). We could not find any comparison to experimental results, since a direct pharmacological blocker of  $I_{ss}$  is not available at this time.<sup>10</sup> Finally, we simulated the effect of 5 mM 4-aminopyridine (4-AP), by completely blocking  $I_{to}$  and  $I_{Kslow}$ , and by 40% block of the maximum conductance value of  $I_{ss}$ , as has been suggested experimentally.<sup>11</sup> As shown in Figure 13, our simulated action potential is again qualitatively very similar to experimentally recorded action potentials in presence of 5 mM 4-AP at room temperature.<sup>22</sup>

In summary, our minimal model of the mouse cardiac action potential is able to qualitatively reproduce many of the repolarization dynamics seen experimentally, based on descriptors for the major repolarizing  $K^+$  currents deemed to be present in mouse ventricular myocytes. Clearly, further improvements in the model are possible, and will be attempted in future studies. These will include incorporating a more rigorous description for  $I_{CaL}$  (including  $Ca^{2+}$ -dependent inactivation), as well as intracellular  $Ca^{2+}$  ( $[Ca^{2+}]_i$ ) regulation. Additional improvements in  $K^+$  current formulation such as including descriptors for  $I_{Kslow1}$  and  $I_{Kslow2}$ , instead of just  $I_{Kslow}$  as in this model, and the activation/reactivation kinetics of  $I_{to}$  based on more detailed experimental data, will help simulate a qualitatively better mouse action potential.

### ***Heart Size versus Reentry Stability***

Previously,<sup>23</sup> we demonstrated that stable rotors are possible in the mouse heart with a ventricular surface area of  $\approx 1 \text{ cm}^2$ . However, success was quite variable and instability was the norm. In fact, it was necessary to repeat the pacing protocols many times to obtain reentry. In the present study we used much less aggressive protocols and therefore, unlike the TG heart, the reentrant activity in the WT was short-lived.

The simulations of reentry presented in Figures 5 and 6 of the main manuscript were conducted using  $2 \times 2 \text{ cm}^2$  sheets. The rotors were stable regardless of whether they were induced in TG or WT sheets. In an effort to better understand the role of size, we carried out additional simulations using much smaller sheets. When the simulations were conducted using 2-D sheets of  $1 \times 1 \text{ cm}^2$ , the TG rotor was stable and maintained the frequency of  $\approx 45 \text{ Hz}$  (data not shown). The example of Figure 14 shows 20 msec snapshots of reentry in a sheet of  $1 \times 1 \text{ cm}^2$  with WT action potential properties. The rotation period was  $\approx 50 \text{ ms}$ . After 2 rotations, the rotor interacted with the sheet boundary and stopped. Thus while reentry was sustained at  $\approx 18.5 \text{ Hz}$  in a WT  $2 \times 2 \text{ cm}^2$  sheet, it was not-sustained in a WT  $1 \times 1 \text{ cm}^2$  sheet. These results support the notion that by increasing the diffusion coefficient  $D$  (i.e., accelerating the conduction velocity) and also abbreviating action potential duration,  $I_{K1}$  overexpression reduces the rotor diameter and allows for stable rotation in the small mouse heart.

#### ***Conduction velocity (CV) distribution in simulated WT and TG rotors.***

In Figure 15, a snapshot of the CV distribution in a  $0.5 \times 0.5 \text{ cm}^2$  area during sustained reentry shows that CV is greatly reduced near the center of rotation (the core) and increases with distance from the core. In the WT sheet (left), very low CV's can be

found at relatively large distances away from the center of rotation compared to TG. However, because of  $I_{K1}$  upregulation in the TG sheet, both the core size and therefore the spatial extension of its electrotonic influence on the reentrant activity of the surrounding tissues are greatly reduced, allowing a faster growth of CV with increasing distances from the core. This is depicted by the tighter clustering of low CV's near the core in the TG case.

***$I_{K1}$  upregulation reduces the core size.***

We have postulated that the steeper increase in CV from the core to the periphery in the TG rotors compared to WT is due the changes in passive membrane properties of the cardiac tissue brought about by the increase in  $I_{K1}$  (decrease in input resistance with increasing  $I_{K1}$ ) which causes the core to diminish in size. To verify this, we measured the diameter of the rotor's core in simulated and experimental WT and TG setting. In Figure 16, we display time-space plots (TSP) of TG and WT experimental and simulated reentry. The characteristic shape of the TSPs is that of spiral wave activation.<sup>3,4</sup> Each TSP displays 2 rotations. The diameter of the core is calculated by measuring the projection of the distance between 2 arms of the TSP<sup>3,4</sup> (the green line on the scale at the left of the TSP). In the simulated WT (panel A) and TG (panel B) reentry, the core diameter measured during 2 rotations is, respectively,  $3.9 \pm 0.3$ mm and  $1.9 \pm 0.1$ mm ( $p < 0.001$ ). In panels C and D, examples of 2 rotations from a WT and a TG rotor are respectively shown. The diameter of the core is  $0.94 \pm 0.03$ mm for WT and  $0.52 \pm 0.19$ mm for TG ( $p < 0.01$ ). The average core diameter for 3 WT and 3 TG rotors is  $1.06 \pm 0.16$ mm and  $0.6 \text{mm} \pm 0.15$ , respectively,  $p < 0.001$ .

***I<sub>K1</sub> upregulation reduces the space constant.***

To obtain an estimate of the space constant, we took an array of 200 by 10 cells (length and width respectively), and applied subthreshold stimuli (for 3 msec) at one end of the 2D array. The distribution of voltage at 3 msec along the length of the cable was used to obtain an estimate of the space constant ( $\lambda$ ) by fitting the voltage normalized to the voltage at the site of injection to a simple exponential decay function of the form

$V=V_0e^{-x/\lambda}$  (Figure 17 B). As expected, in the TG case where  $I_{K1}$  was increased by 12 fold, the model displayed a smaller space constant than the WT case ( $\lambda= 0.43$  mm vs  $\lambda= 0.66$  mm). This can be seen in the colored voltage distribution maps (Figure 17 A) where the voltage decreased faster with distance in the TG sheet compared to the WT.



## FIGURE LEGENDS FOR ONLINE SUPPLEMENT

**Figure 1.** Western blot. Membrane fractions from 2 WT and 2 TG hearts probed with anti Kir2.1 antibody. Left lane WT, right lane TG.

**Figure 2.** Characteristics of  $I_{to}$ . **(A.)** Steady-state activation and inactivation characteristics at 22 °C. **(B.)** Time constants for activation/inactivation as a function of voltage at 22 °C. Experimental data for activation (\*) and inactivation (o) for  $I_{to}$  are plotted.<sup>10</sup> **(C.)** Simulated time-dependent  $I_{to}$  current in response to voltage-clamp pulses, (from -50 to +40 mV, in steps of +10 mV, holding potential of -80 mV) at 22 °C. **(D.)** Peak Current-Voltage (I-V) relationship for  $I_{to}$  at 22 °C, along with experimental data (o).<sup>10</sup> **(E.)** Simulated time-dependent  $I_{to}$  current at 37 °C, and **(F.)** Peak I-V relationship for  $I_{to}$  at 37 °C.

**Figure 3.** Characteristics of  $I_{Kslow}$  **(A.)** Steady-state activation and inactivation characteristics at 22 °C. **(B.)** Time constants for activation/inactivation as a function of voltage at 22 °C. Experimental data for activation (\*) and inactivation (o) for  $I_{Kslow}$  are plotted.<sup>10</sup> Red curve is representative of activation time constant for  $I_{Kslow}$  from a recently published mouse model.<sup>6</sup> **(C.)** Simulated time-dependent  $I_{Kslow}$  current in response to voltage-clamp pulses, (from -50 to +40 mV, in steps of +10 mV, holding potential of -80 mV) at 22 °C, along with experimental data (o).<sup>10</sup> **(D.)** Peak Current-Voltage (I-V) relationship for  $I_{Kslow}$  at 22 °C. **(E.)** Simulated time-dependent  $I_{Kslow}$  current at 37 °C, and **(F.)** Peak I-V relationship for  $I_{Kslow}$  at 37 °C.

**Figure 4.** Characteristics of  $I_{ss}$  **(A.)** Steady-state activation characteristic at 22 °C. **(B.)** Time constant for activation as a function of membrane voltage at 22 °C. Experimental data for activation (o) is plotted.<sup>10</sup> Red curve is representative of activation time constant for  $I_{ss}$  from a recently published mouse model.<sup>6</sup> **(C.)** Simulated time-dependent  $I_{ss}$  current in response to voltage-clamp pulses, (from -50 to +40 mV, in steps of +10 mV, holding potential of -80 mV) at 22 °C. **(D.)** Peak Current-Voltage (I-V) relationship for  $I_{ss}$  at 22 °C, along with experimental data (o).<sup>10</sup> **(E.)** Simulated time-dependent  $I_{ss}$  current at 37 °C, and **(F.)** Peak I-V relationship for  $I_{ss}$  at 37 °C.

**Figure 5.** Comparison of simulated I-V relationship of  $I_{K1}$  in wild-type (black) and Kir2.1 TG (red) mouse models.

**Figure 6.** Simulated and experimental<sup>16</sup> mouse ventricular action potentials under control conditions at 1 Hz, at 37 °C and 35 °C respectively.

**Figure 7.** Mouse ventricular action potential under control conditions (1 Hz, 37 °C) and the underlying ionic currents ( $I_{K1}$ ,  $I_{NaCa}$ ,  $I_{NaK}$ , and  $I_B$ ).

**Figure 8.** Rate dependence of simulated mouse ventricular action potentials at 1 Hz (black), and 10 Hz (red). Corresponding digitized experimental action potentials<sup>20</sup> at 1 and 10 Hz are shown in the inset.

**Figure 9.** Effect of blocking the maximum conductance value of  $I_{K_{slow}}$  by 80%. The simulated mouse ventricular action potential at  $I_{K_{slow}}*2$  (red), and the control action potential (black) are shown. Corresponding digitized experimental action potential recordings in control and in the presence of 50  $\mu$ M 4-AP at 35  $^{\circ}$ C<sup>9</sup> are shown in the inset.

**Figure 10.** Effect of blocking the maximum conductance value of  $I_{to}$  by 100% on the simulated mouse ventricular action potential is shown in the top panel. In the middle panel, experimental<sup>21</sup> action potential recordings at 22  $^{\circ}$ C, and depolarization-activated  $K^{+}$  current recordings along with the corresponding I-V relationships for wild-type and TG (Kv4.2N) mice are shown (Note that the action potentials and currents were recorded from the same myocyte for the wild-type and TG mice respectively). The bottom panel shows simulated action potential when  $I_{to}$  was blocked completely, and in addition, both  $I_{K_{slow}}$  and  $I_{ss}$  were blocked by 25% respectively.

**Figure 11.** Simulated mouse ventricular action potentials in control and TG cases ( $I_{K1}$  conductance in control case multiplied by 12, and  $I_{ss}$  conductance in control case multiplied by 1.36). Corresponding digitized experimental<sup>1</sup> monophasic action potentials in control and Kir2.1 over-expressor mouse heart are also shown in the inset.

**Figure 12.** Simulated mouse ventricular action potentials in control case and when  $I_{ss}$  was blocked completely.

**Figure 13.** Simulated mouse ventricular action potentials in control case, and when  $I_{to}$  and  $I_{Kslow}$  were blocked by 100% each, and  $I_{ss}$  conductance was reduced by 40% simultaneously are shown. Digitized experimental<sup>22</sup> action potentials at 22 °C in control case and in presence of 5 mM 4-AP are also shown in the inset.

**Figure 14.** Reentry in a 1x1 cm<sup>2</sup> sheet with WT action potential properties. Frames are 20 msec snapshots of the rotor. After about 2 rotations, the wavefront hits the upper border of the sheet and the rotor self-terminates. Please see Online Supplement for comparison of “WT1b1sim” with “WT2b2sim” movies.

**Figure 15.** Effect of  $I_{K1}$  upregulation on core size and spatial extension of its influence. Conduction velocity measurements were carried out in simulated WT and TG 2x2 cm<sup>2</sup> sheets sustaining stable rotating activity. Left panel, CV distribution in a 0.5 x 0.5 cm<sup>2</sup> area during reentry in the WT sheet. Right panel, CV distribution in a 0.5 x 0.5 cm<sup>2</sup> area during reentry in the TG sheet. Color code indicates velocity. Horizontal calibration 0.5 cm

**Figure 16.** Core diameter measurements from time-space plots (TSP). Simulation. A, TSP of 2 rotations during WT reentry. 1 rotation is indicated by the light blue line. The diameter of the core is the projected distance (green line) on the 2 cm scale of the space between the 2 arms of the TSP. B, TSP of 2 rotations during TG reentry. Experimental. C, TSP of 2 rotations during WT reentry. D, TSP of 2 rotations during TG reentry. The horizontal black arrow indicates the direction of time.

**Figure 17.** Measurement of the space constant  $\lambda$ . A, The voltage normalized to the voltage at the site of subthreshold current injection is depicted across 10 cells (vertical direction) and a distance of 3 mm (horizontal direction). The color scale indicates voltages from 0 to 100%. The scale bar represents 1 mm. B, Fitting of the voltage normalized to the voltage at the site of injection to a simple exponential decay function of the form  $V=V_0e^{-x/\lambda}$ . For WT, the fit was:  $99e^{-x/0.66}$ ,  $R=0.998$ . For TG, it was:

$$103e^{-x/0.43}, R=0.998$$

## **REFERENCES**

1. Li J, McLerie M, Lopatin AN. Transgenic Up-Regulation of IK1 in The Mouse Heart Leads to Multiple Abnormalities of Cardiac Excitability. *Am J Physiol Heart Circ Physiol*. 2004;287:H2790-802.
2. Pond AL, Scheve BK, Benedict AT, Petrecca K, Van Wagoner DR, Shrier A, Nerbonne JM. Expression of distinct ERG proteins in rat, mouse, and human heart. Relation to functional I(Kr) channels. *J Biol Chem*. 2000;275:5997-6006.
3. Davidenko JM. Spiral wave activity: a possible common mechanism for polymorphic and monomorphic ventricular tachycardias. *J Cardiovasc Electrophysiol*. 1993;4:730-46.
4. Davidenko JM, Pertsov AV, Salomonsz R, Baxter W, Jalife J. Stationary and drifting spiral waves of excitation in isolated cardiac muscle. *Nature*. 1992;355:349-51.
5. Pandit SV, Clark RB, Giles WR, Demir SS. A mathematical model of action potential heterogeneity in adult rat left ventricular myocytes. *Biophys J*. 2001;81:3029-51.
6. Bondarenko VE, Szigeti GP, Bett GC, Kim SJ, Rasmusson RL. Computer model of action potential of mouse ventricular myocytes. *Am J Physiol Heart Circ Physiol*. 2004;287:H1378-403.
7. Luo CH, Rudy Y. A model of the ventricular cardiac action potential. Depolarization, repolarization, and their interaction. *Circ Res*. 1991;68:1501-26.
8. ten Tusscher KH, Noble D, Noble PJ, Panfilov AV. A model for human ventricular tissue. *Am J Physiol Heart Circ Physiol*. 2004;286:H1573-89.

9. Zhou J, Jeron A, London B, Han X, Koren G. Characterization of a slowly inactivating outward current in adult mouse ventricular myocytes. *Circ Res.* 1998;83:806-14.
10. Brouillette J, Clark RB, Giles WR, Fiset C. Functional properties of K<sup>+</sup> currents in adult mouse ventricular myocytes. *J Physiol.* 2004;559:777-98.
11. Xu H, Guo W, Nerbonne JM. Four kinetically distinct depolarization-activated K<sup>+</sup> currents in adult mouse ventricular myocytes. *J Gen Physiol.* 1999;113:661-78.
12. Agus ZS, Dukes ID, Morad M. Divalent cations modulate the transient outward current in rat ventricular myocytes. *Am J Physiol.* 1991;261:C310-8.
13. Fiset C, Clark RB, Larsen TS, Giles WR. A rapidly activating sustained K<sup>+</sup> current modulates repolarization and excitation-contraction coupling in adult mouse ventricle. *J Physiol.* 1997;504 ( Pt 3):557-63.
14. Nattel S, Yue L, Wang Z. Cardiac ultrarapid delayed rectifiers: a novel potassium current family of functional similarity and molecular diversity. *Cell Physiol Biochem.* 1999;9:217-26.
15. Zhou J, Kodirov S, Murata M, Buckett PD, Nerbonne JM, Koren G. Regional upregulation of Kv2.1-encoded current, I<sub>K,slow2</sub>, in Kv1DN mice is abolished by crossbreeding with Kv2DN mice. *Am J Physiol Heart Circ Physiol.* 2003;284:H491-500.
16. Kodirov SA, Brunner M, Nerbonne JM, Buckett P, Mitchell GF, Koren G. Attenuation of I<sub>K,slow1</sub> and I<sub>K,slow2</sub> in Kv1/Kv2DN mice prolongs APD and QT intervals but does not suppress spontaneous or inducible arrhythmias. *Am J Physiol Heart Circ Physiol.* 2004;286:H368-74.

17. Padmala S, Demir SS. Computational model of the ventricular action potential in adult spontaneously hypertensive rats. *J Cardiovasc Electrophysiol*. 2003;14:990-5.
18. Dibb K, Eisner D, Tafford A. Frequency-dependent changes in the L-type Calcium current intracellular calcium and sodium concentrations in rat ventricular myocytes. Proceedings of the Physiological Society. *Proceedings of the Physiological Society*. 2004;560 P C32.
19. Pandit SV, Berenfeld O, Anumonwo JM, Zaritski RM, Kneller J, Nattel S, Jalife J. Ionic determinants of functional reentry in a 2-D model of human atrial cells during simulated chronic atrial fibrillation. *Biophys J*. 2005;88:3806-21.
20. Guo W, Li H, London B, Nerbonne JM. Functional consequences of elimination of  $i(t_o,f)$  and  $i(t_o,s)$ : early afterdepolarizations, atrioventricular block, and ventricular arrhythmias in mice lacking Kv1.4 and expressing a dominant-negative Kv4 alpha subunit. *Circ Res*. 2000;87:73-9.
21. Wickenden AD, Lee P, Sah R, Huang Q, Fishman GI, Backx PH. Targeted expression of a dominant-negative K(v)4.2 K(+) channel subunit in the mouse heart. *Circ Res*. 1999;85:1067-76.
22. Xu Y, Dong PH, Zhang Z, Ahmmed GU, Chiamvimonvat N. Presence of a calcium-activated chloride current in mouse ventricular myocytes. *Am J Physiol Heart Circ Physiol*. 2002;283:H302-14.
23. Vaidya D, Morley GE, Samie FH, Jalife J. Reentry and fibrillation in the mouse heart. A challenge to the critical mass hypothesis. *Circ Res*. 1999;85:174-81.
