# Supplementary material
Source: PubMed Central journal article supplement (PMC2075137)
Supplement: jphysiol_2006.121475_2.pdf [file jphysiol_2006.121475_2.pdf]

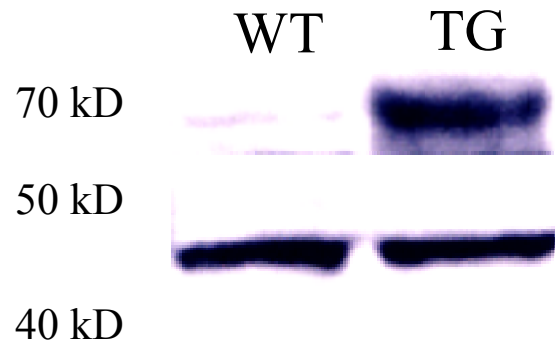

Figure 1

# $I_{to}$ (At 22 °C)

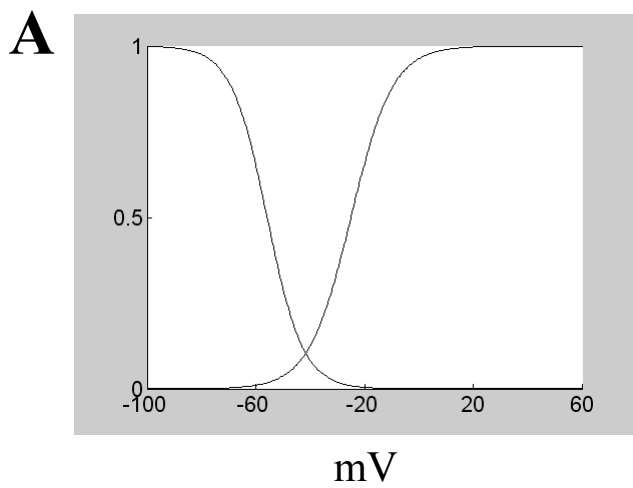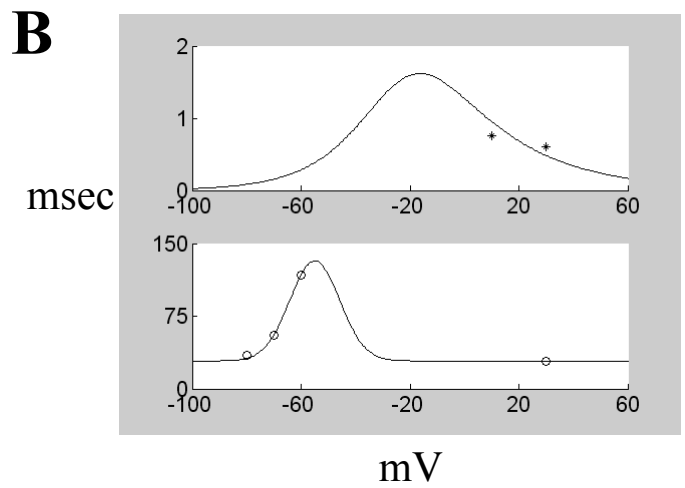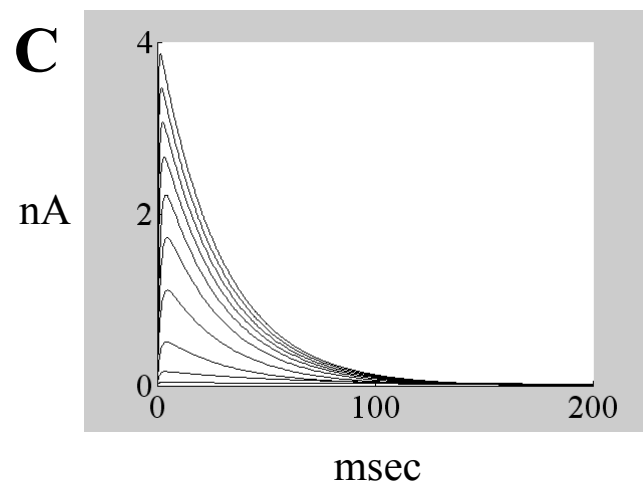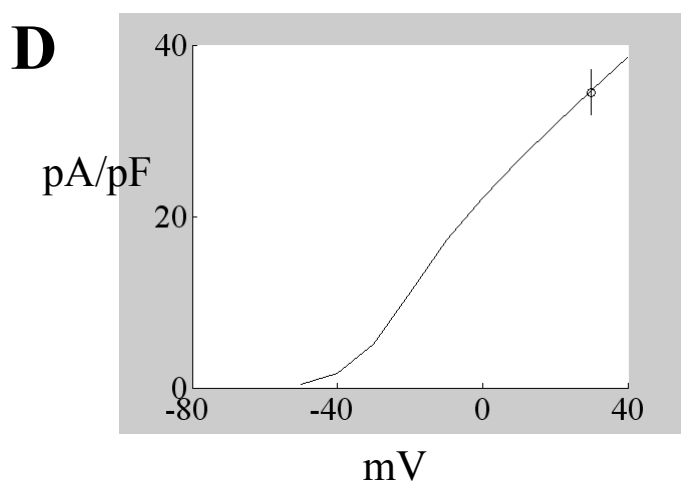

# $I_{to}$ (At 37 °C)

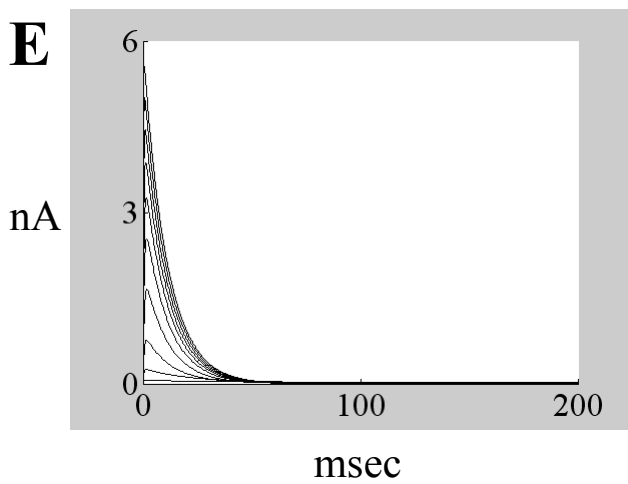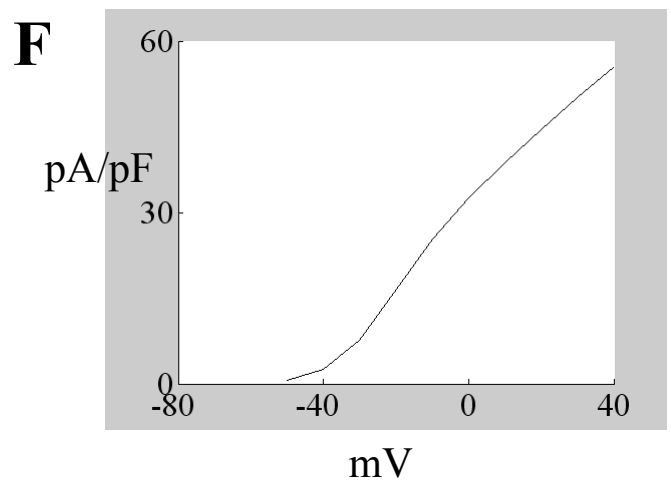

**Fig. 2**

# $I_{Kslow}$ (At 22 °C)

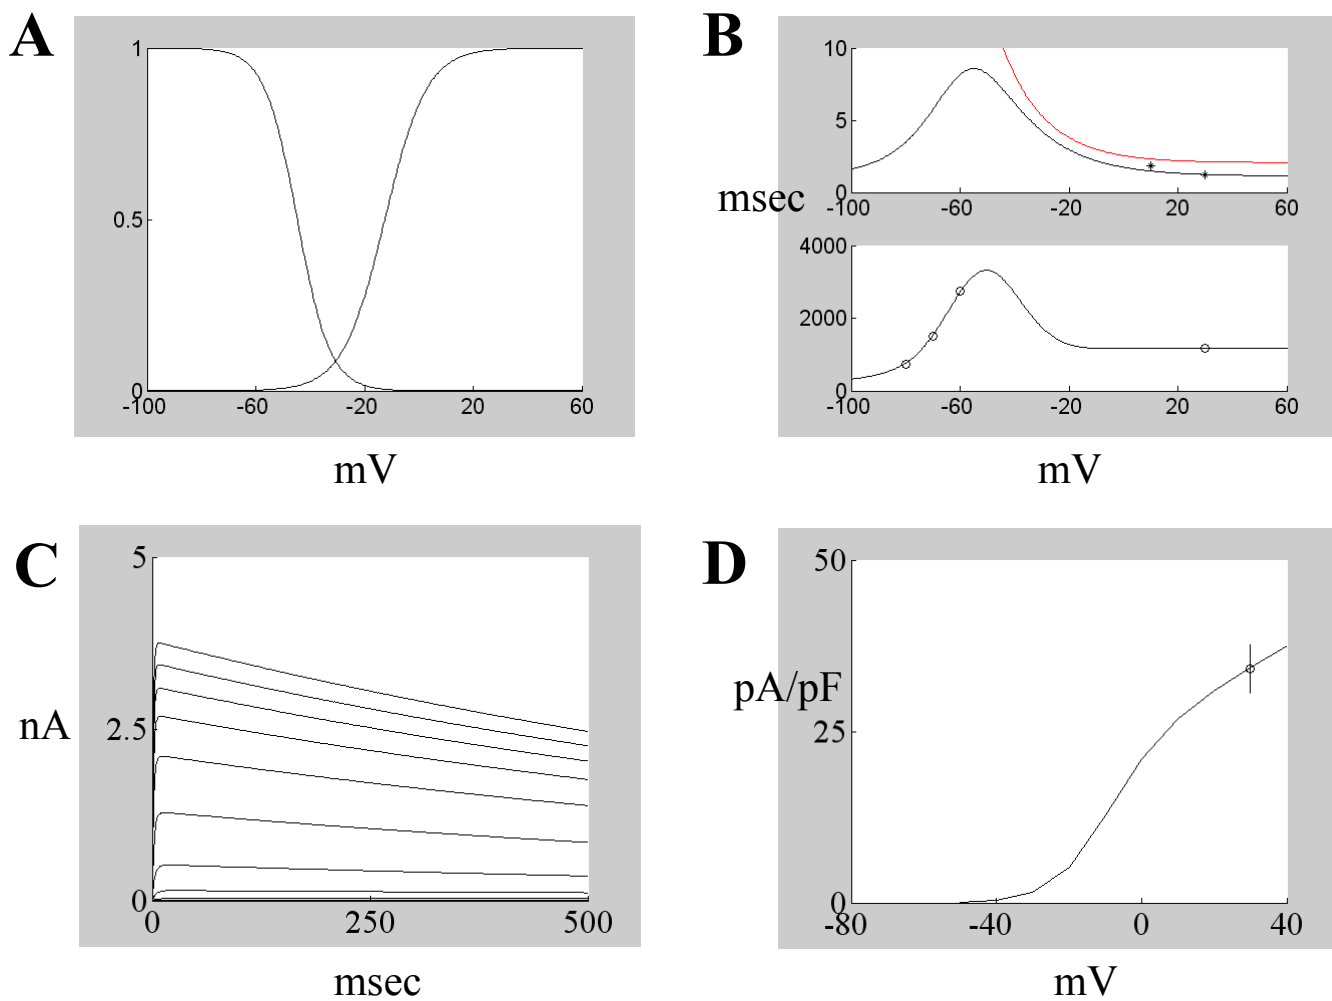

# $I_{Kslow}$ (At 37 °C)

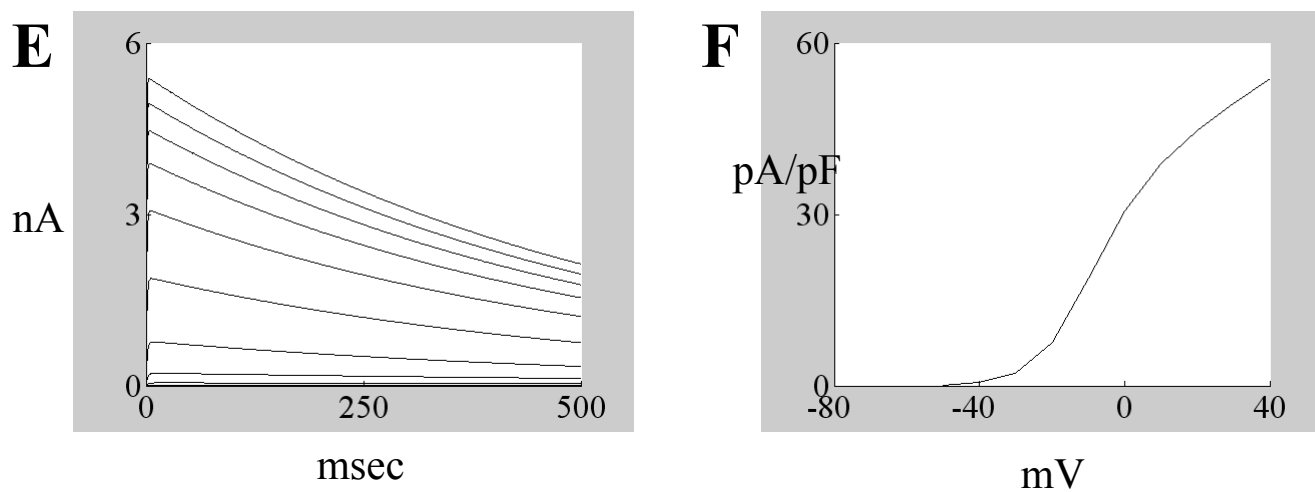

**Fig. 3**

# $I_{ss}$ (At 22 °C)

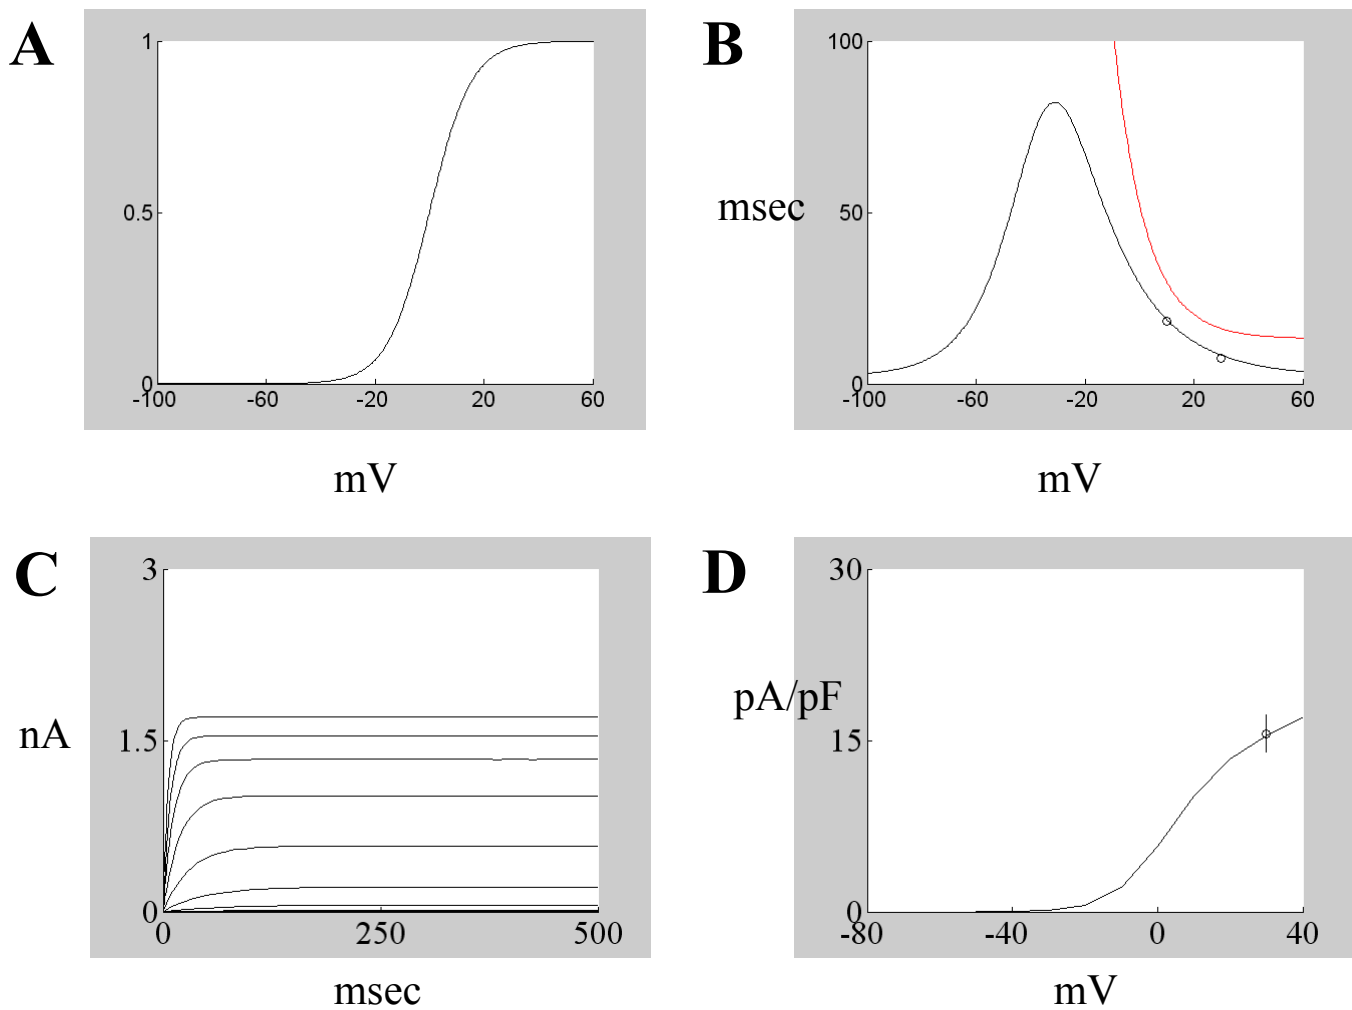

# $I_{ss}$ (At 37 °C)

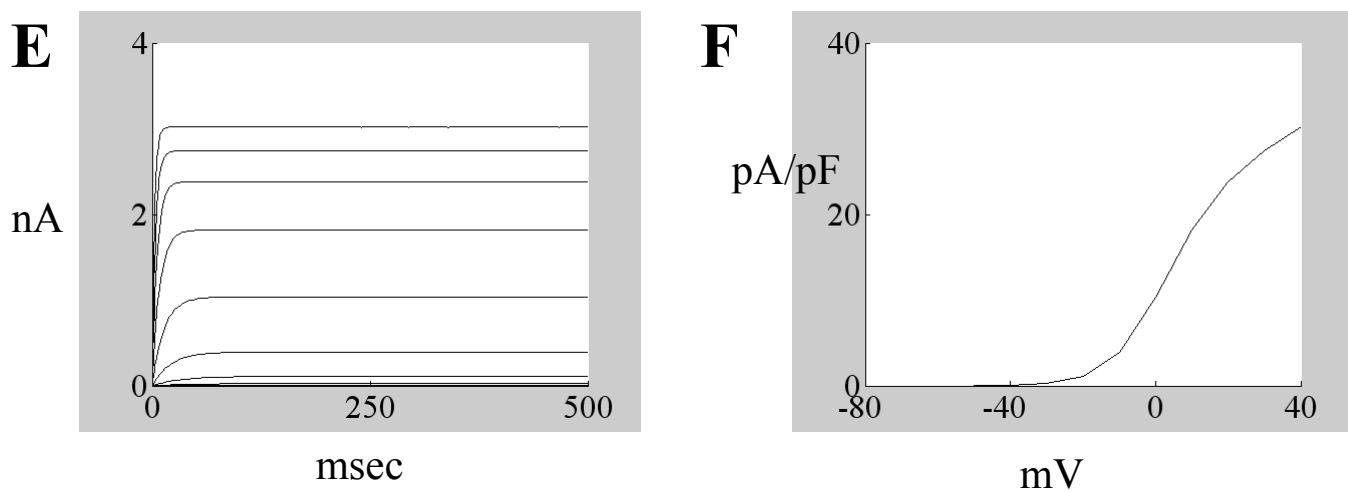

**Fig. 4**

$I_{K1}$  (At 37 °C) in model

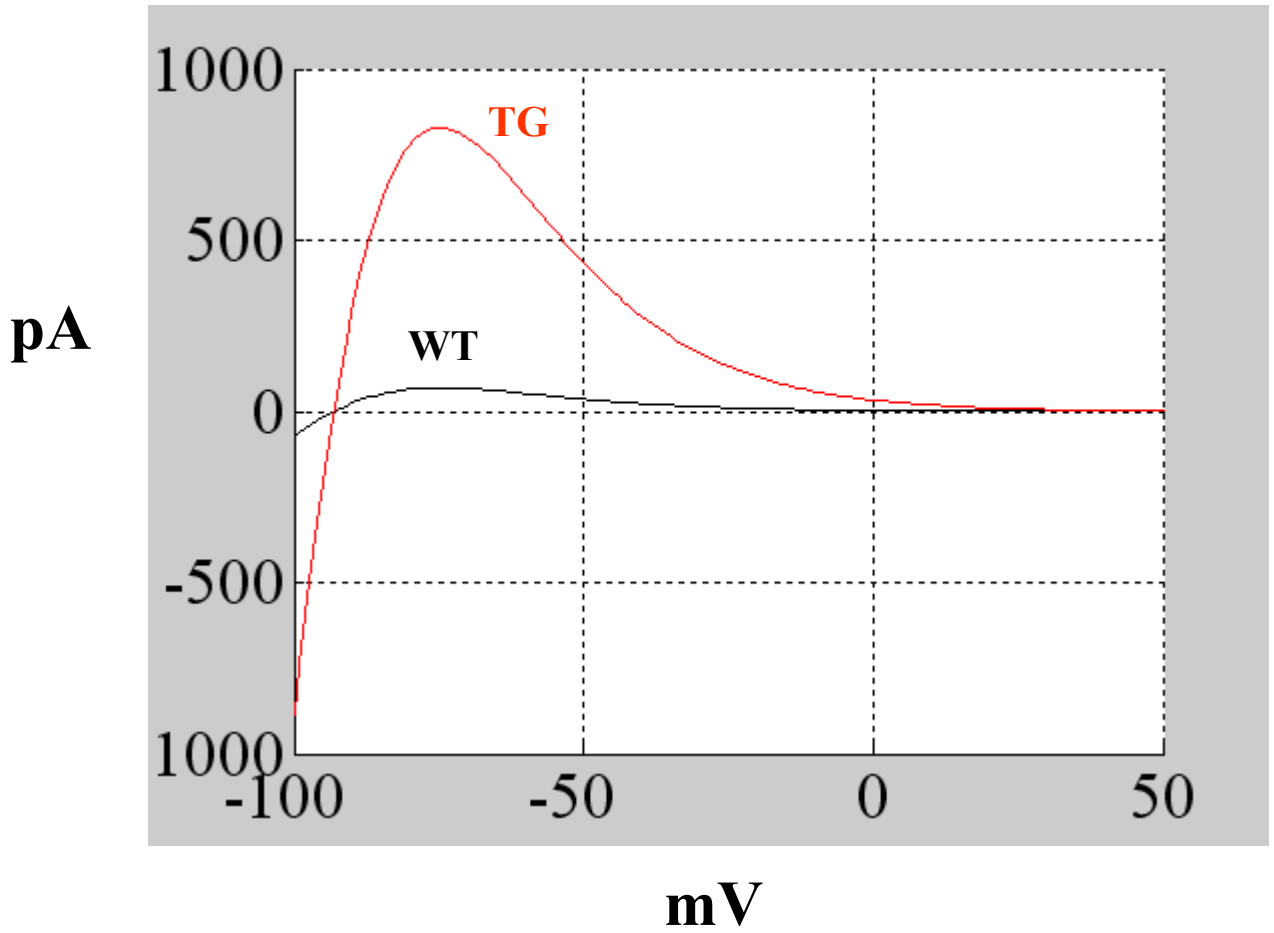

**Fig. 5**

# Control Action Potential

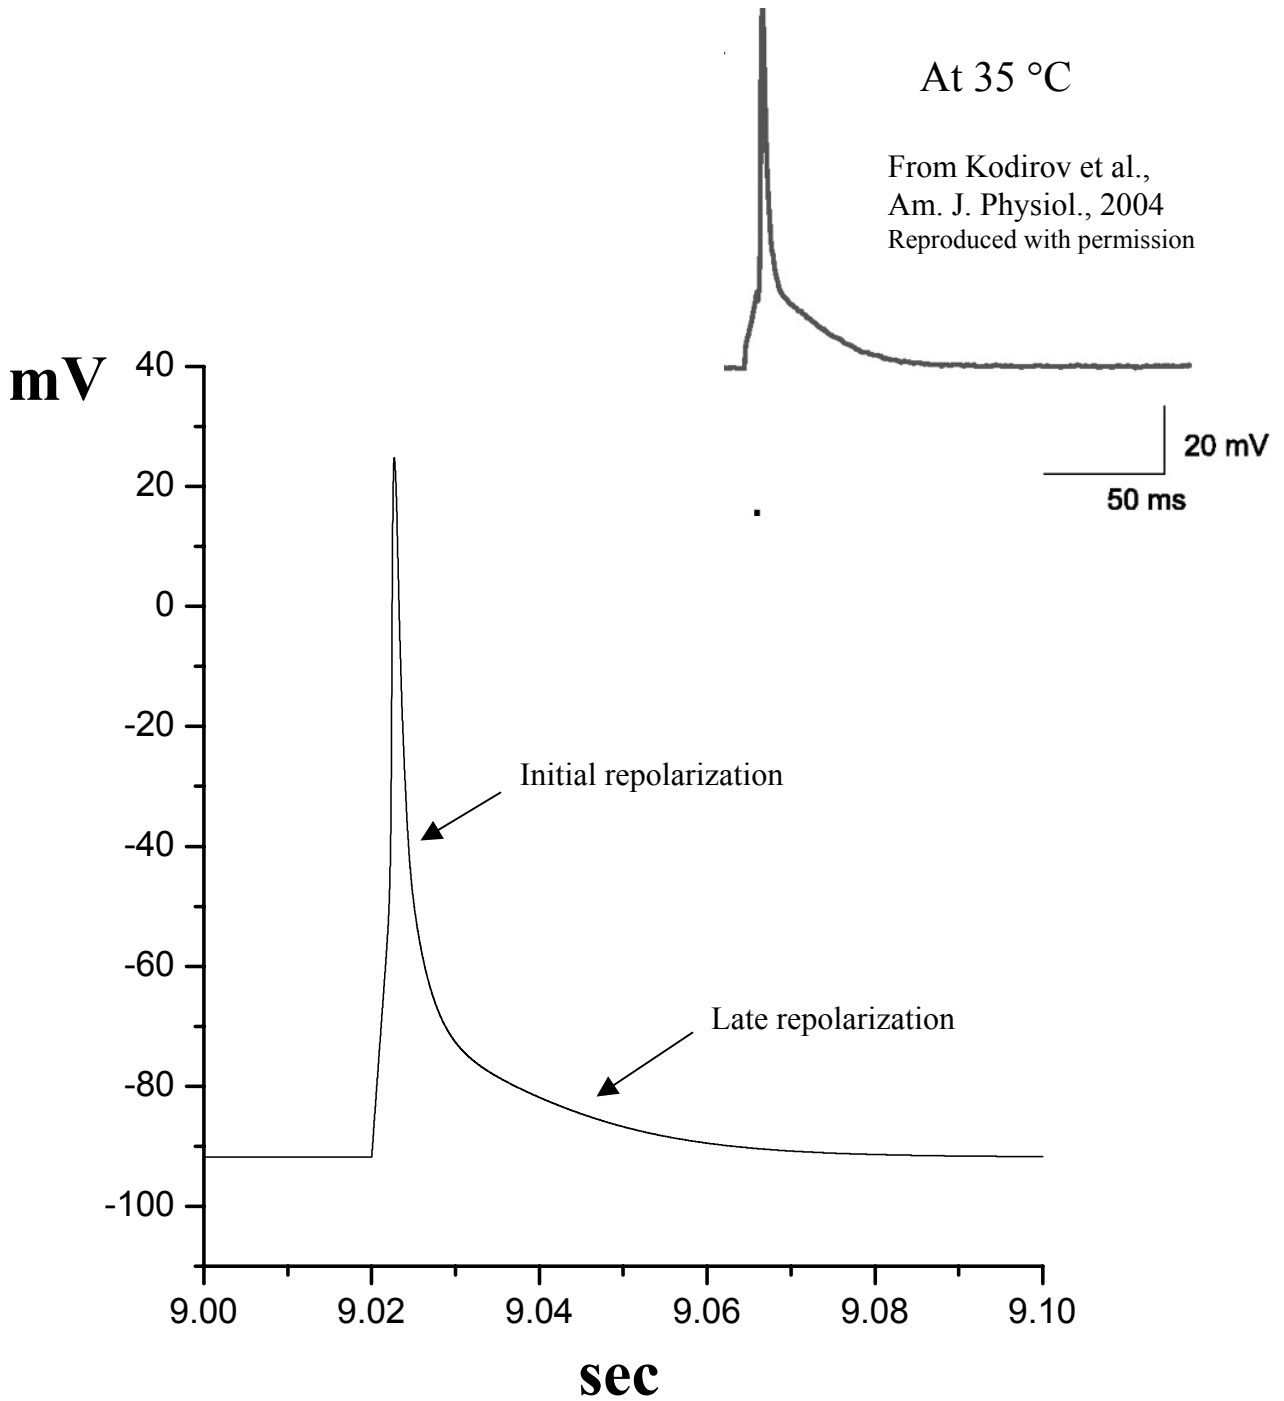

**Fig. 6**

# Currents underlying control action potential

—  $I_B$       —  $I_{NaK}$   
—  $I_{K1}$       —  $I_{NaCa}$

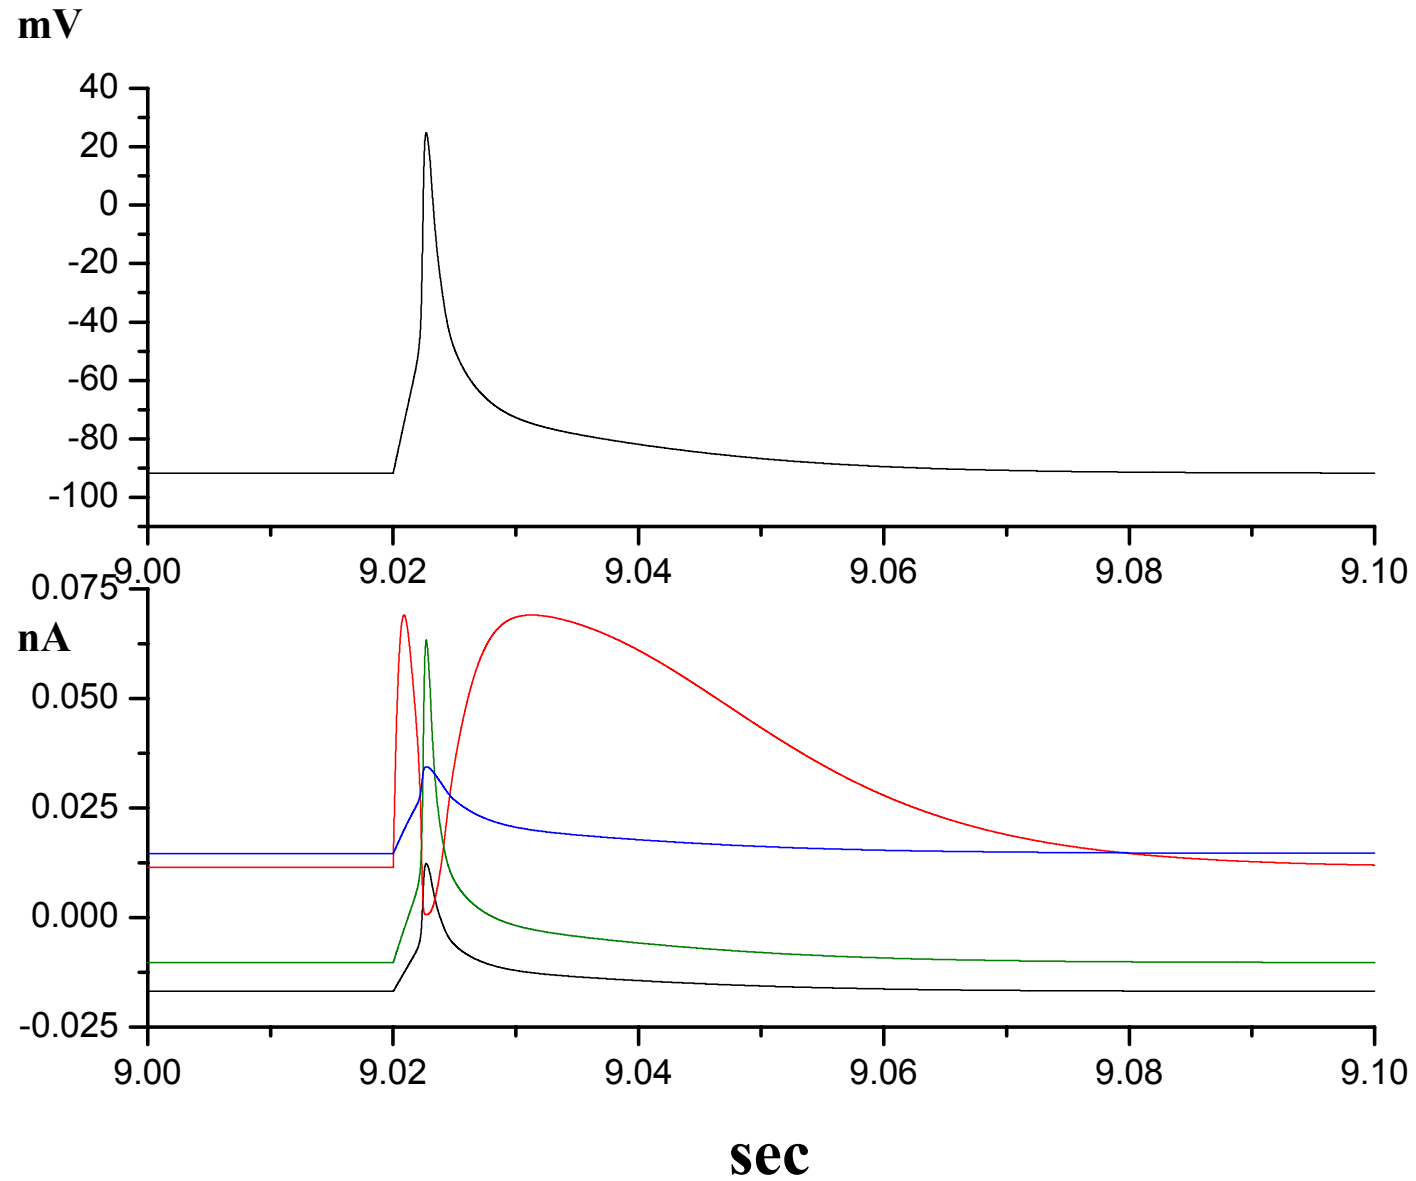

**Fig. 7**

# Rate Dependence of Action Potential

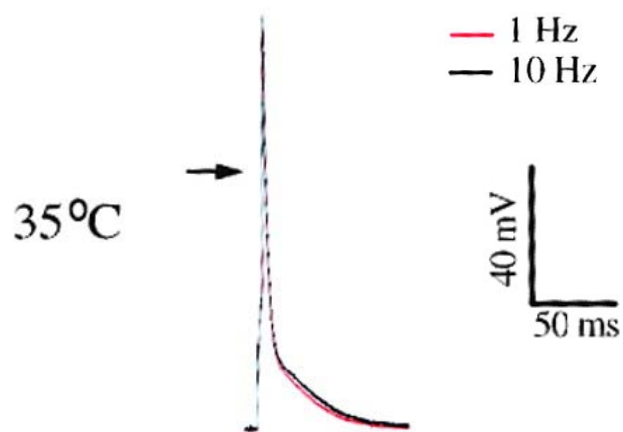

From Guo et al.,  
Circ. Res., 2000  
Reproduced with permission

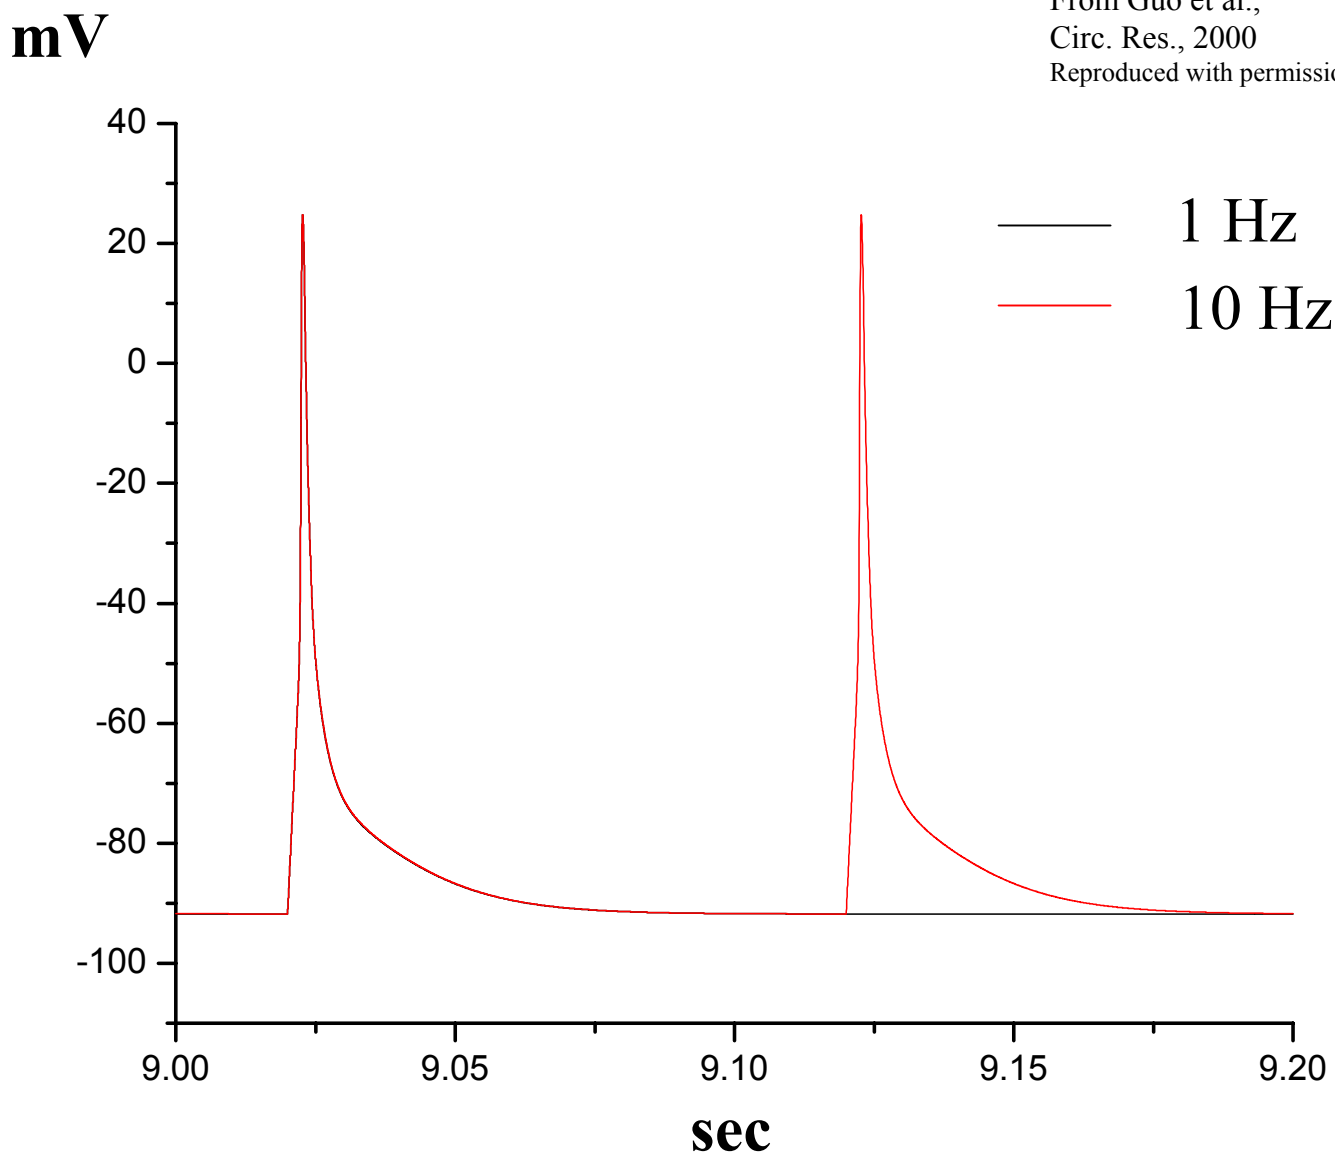

**Fig. 8**



# Effect of 50 $\mu\text{M}$ 4-AP

At 35 °C

From Zhou et al.,  
Circ. Res., 1998  
Reproduced with permission

20 mV  
10 ms

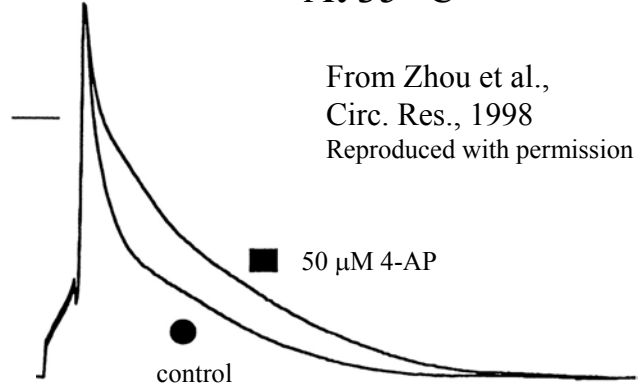

mV

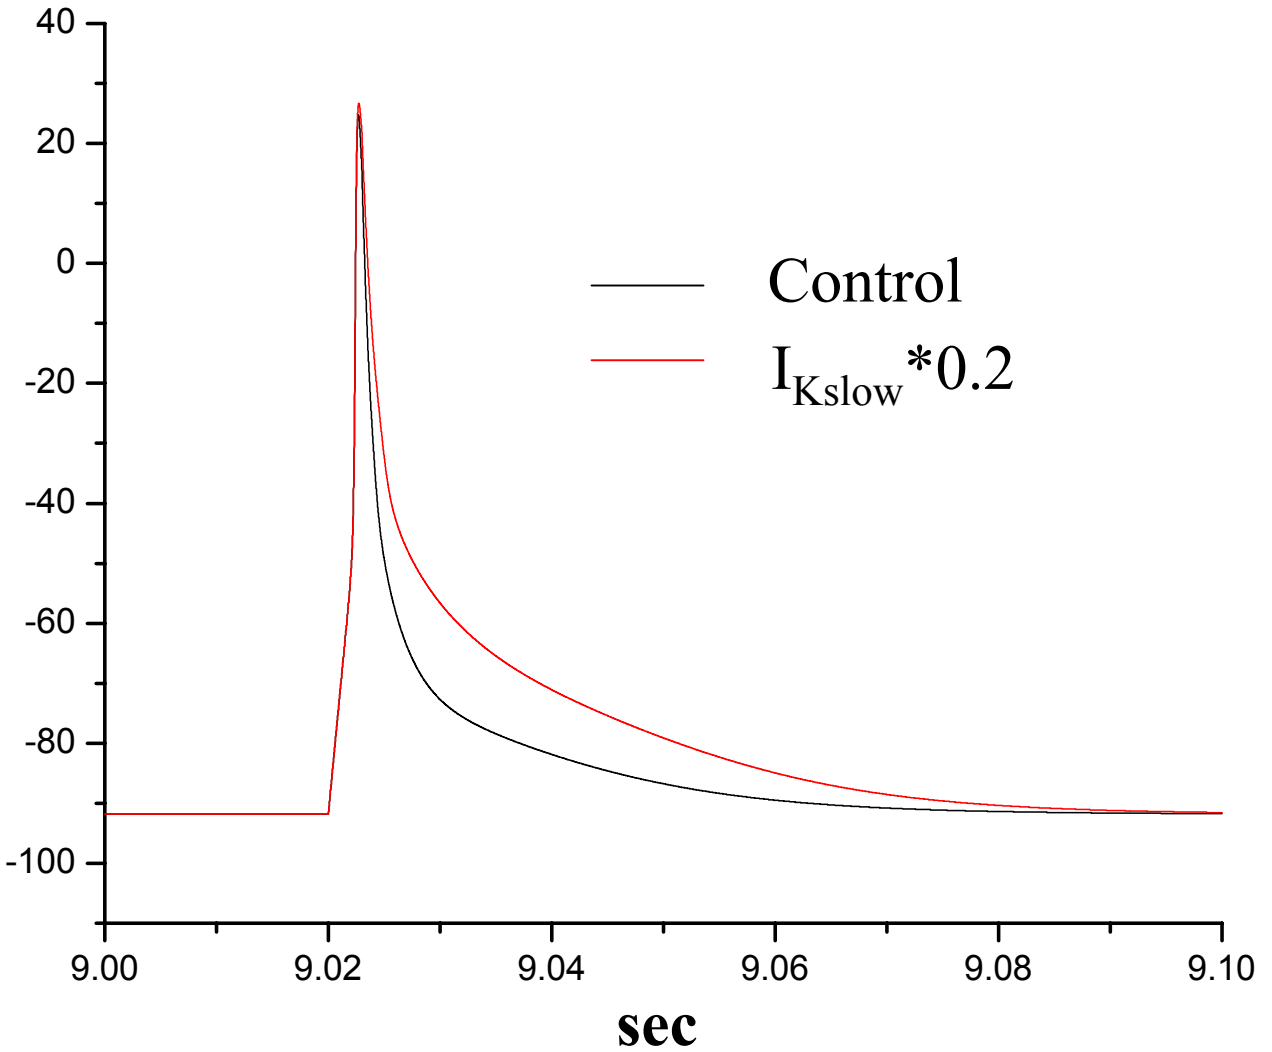

**Fig. 9**

# Effect of $I_{to}$ Knock-out

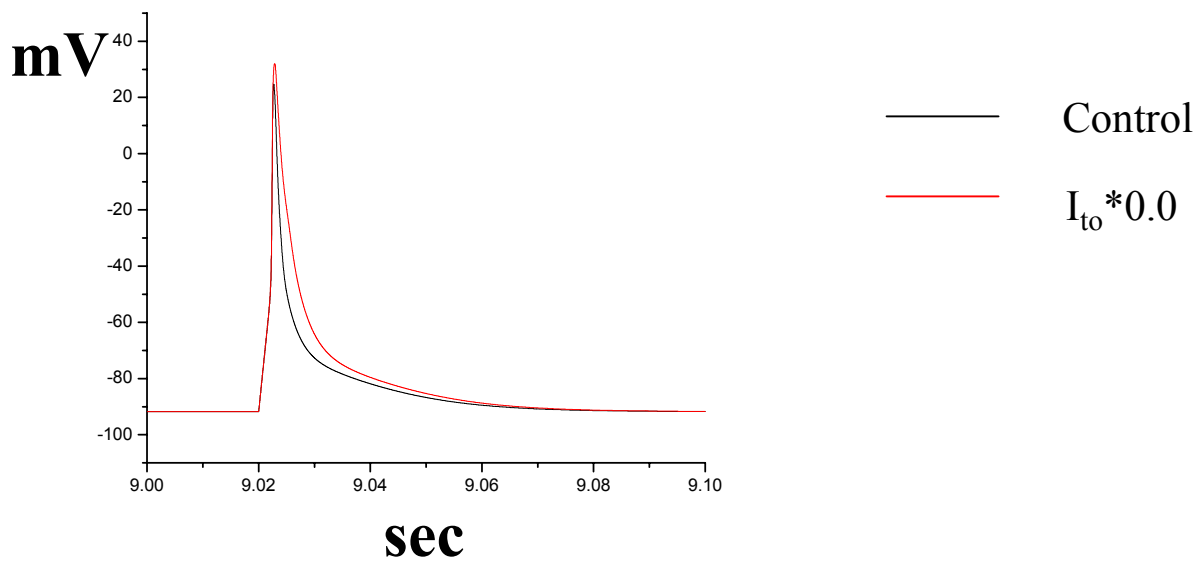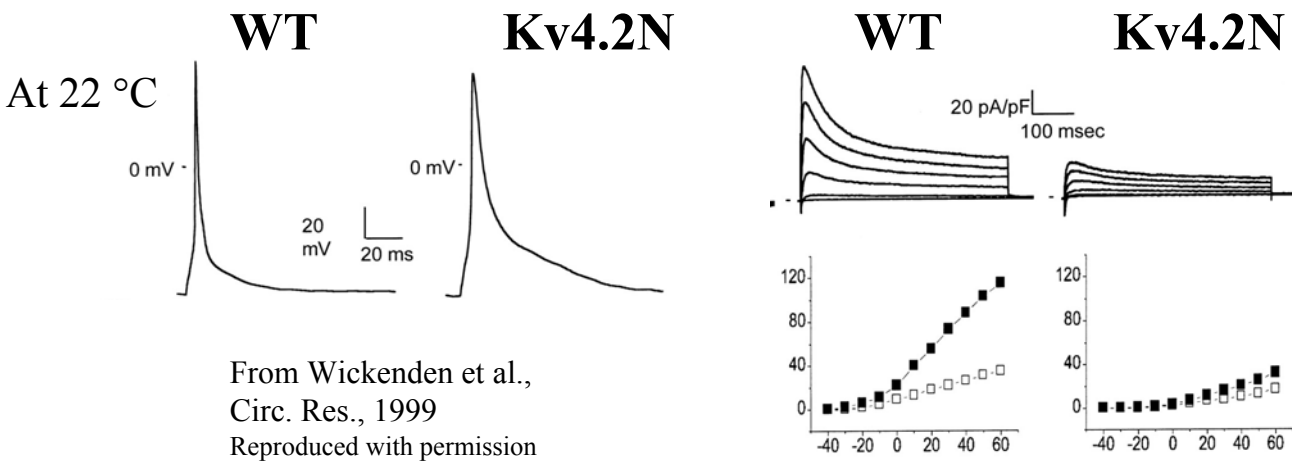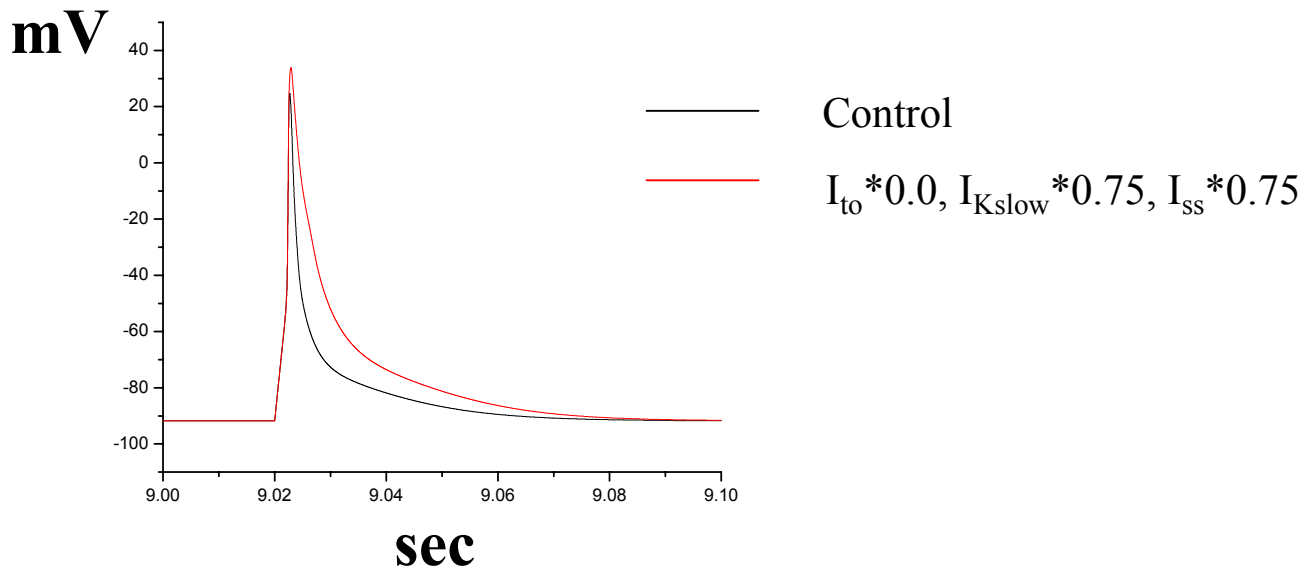

**Fig. 10**

# Comparing control and Transgenic action potentials

MAP Recording

From Li et al.,  
Am. J. Physiol., 2004  
Reproduced with permission

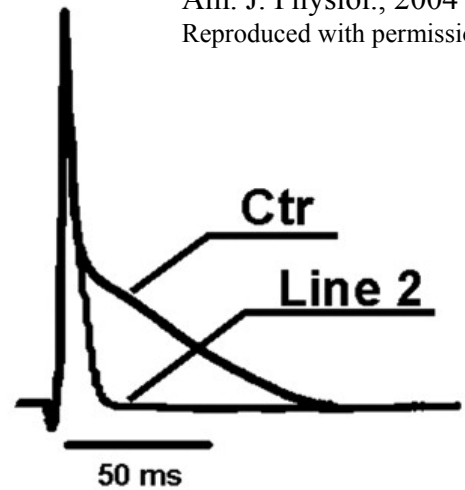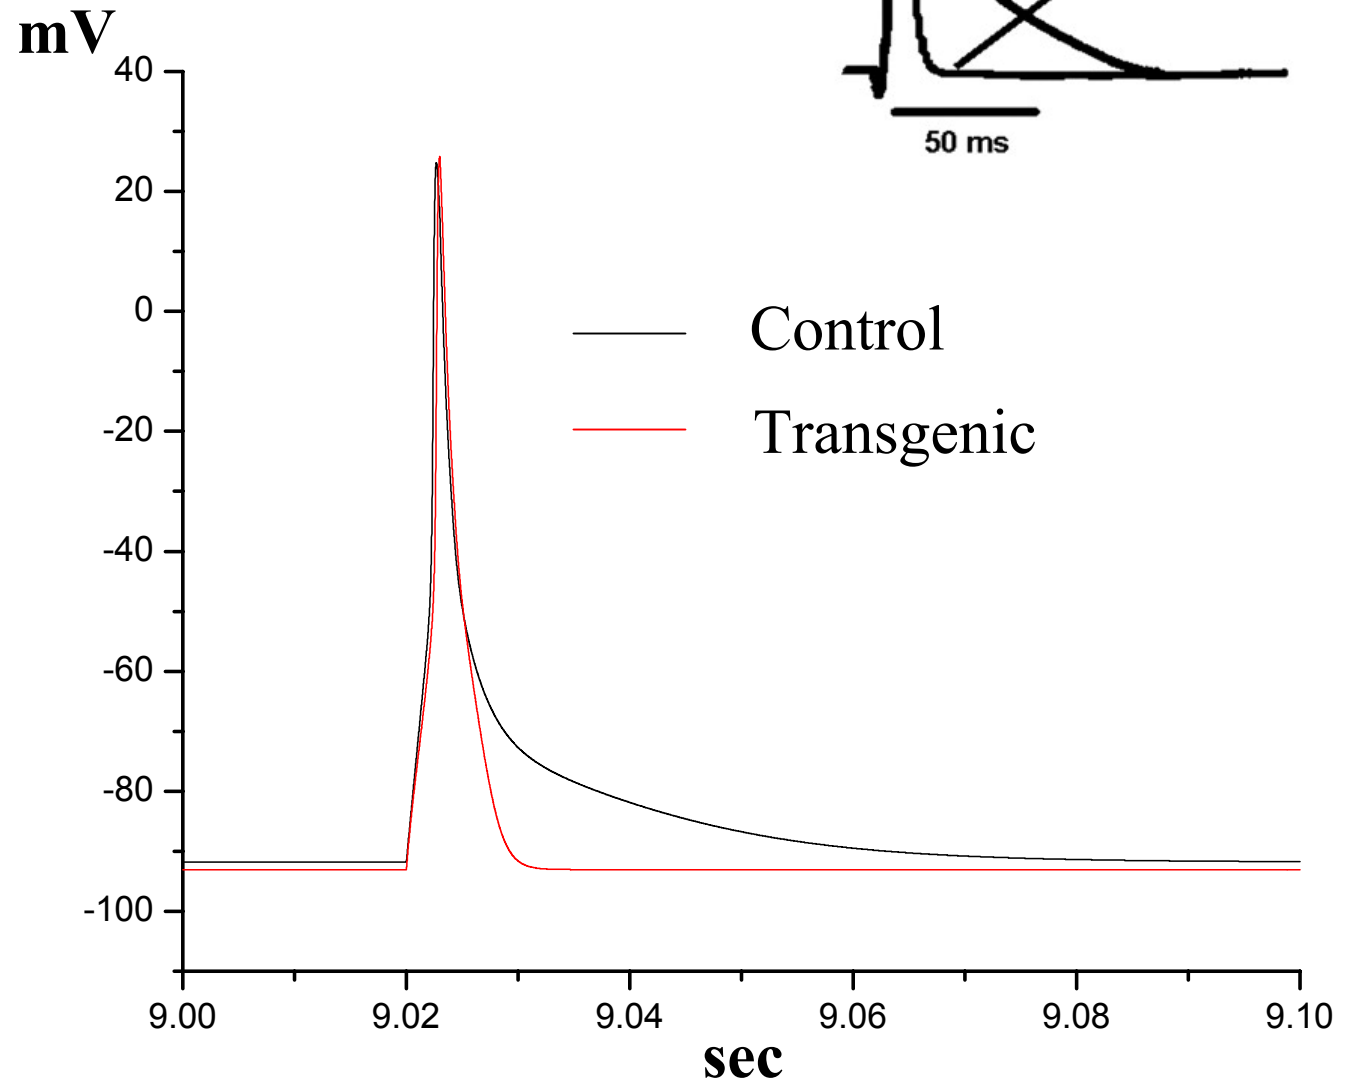

**Fig. 11**

# Effect of complete block of $I_{ss}$

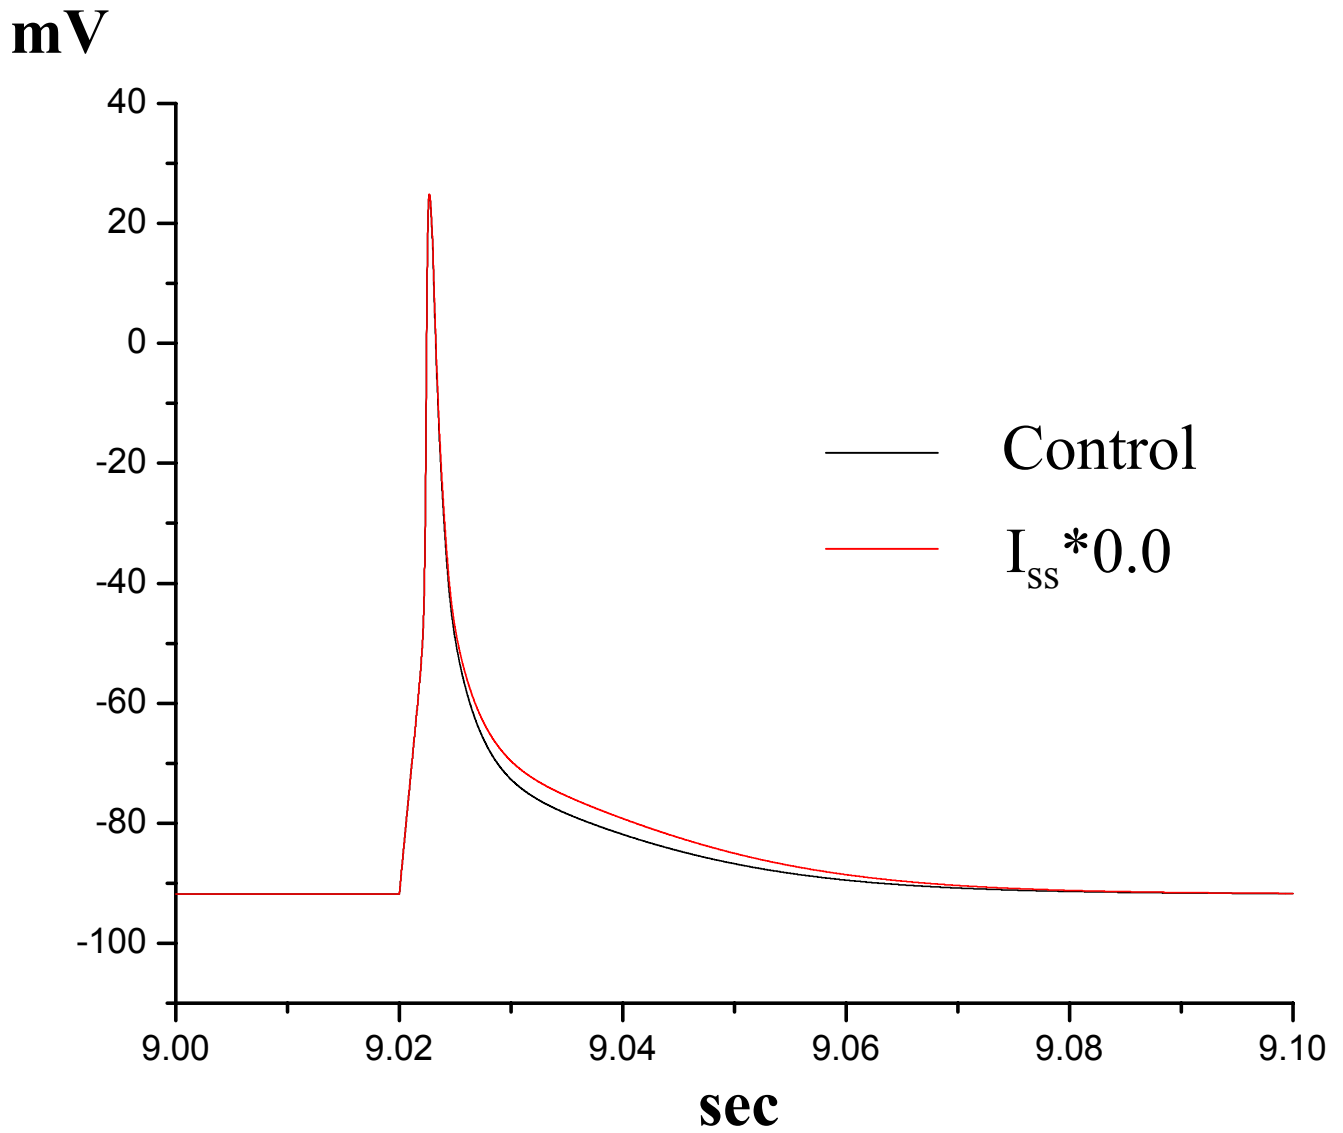

**Fig. 12**

# Effect of 5 mM 4-AP

From Xu et al.,  
Am. J. Physiol., 2002  
Reproduced with permission

At 22 °C

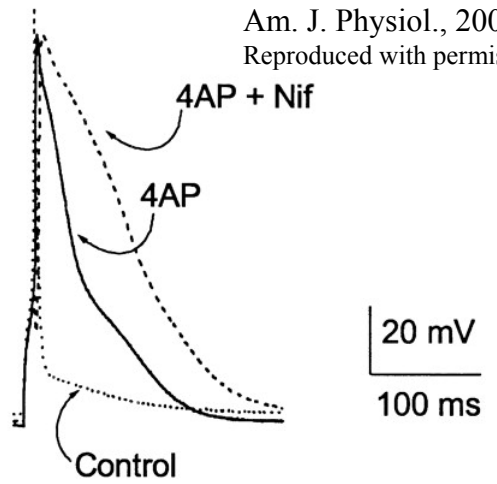

mV

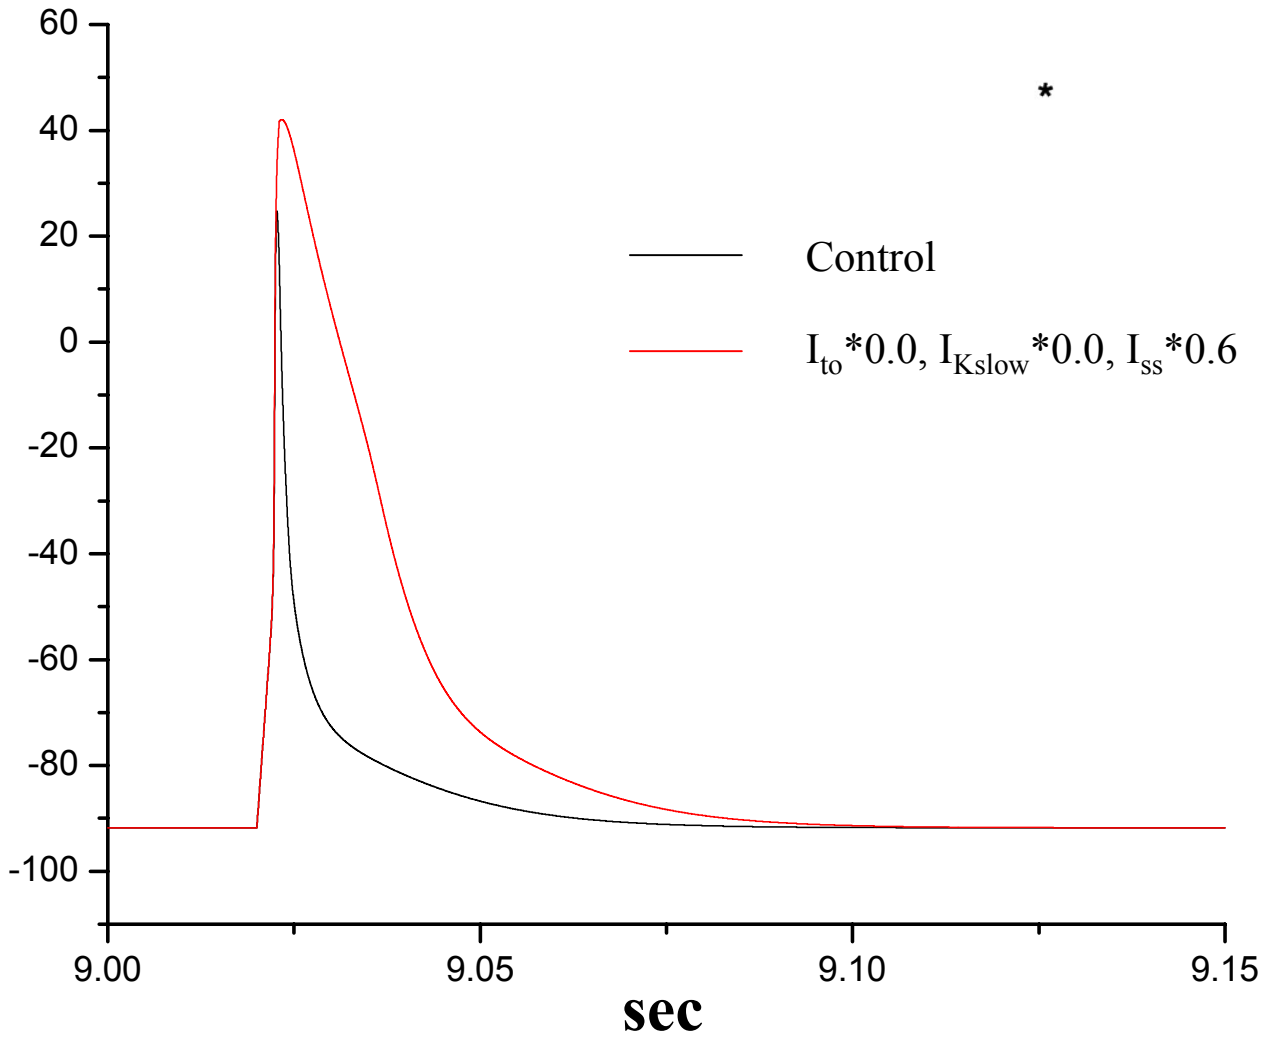

Fig. 13

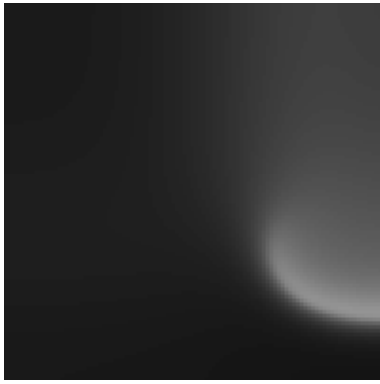

$t = 60 \text{ ms}$

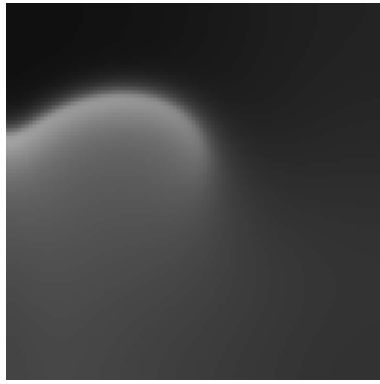

$t = 80 \text{ ms}$

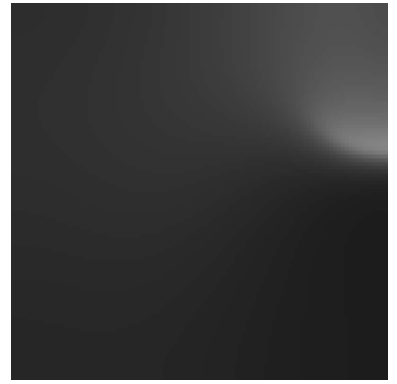

$t = 100 \text{ ms}$

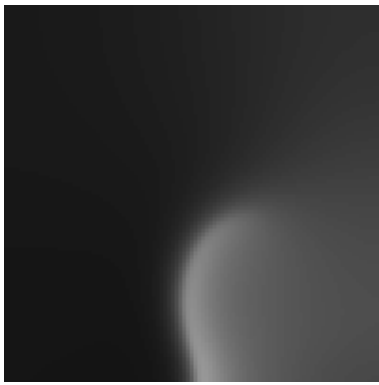

$t = 120 \text{ ms}$

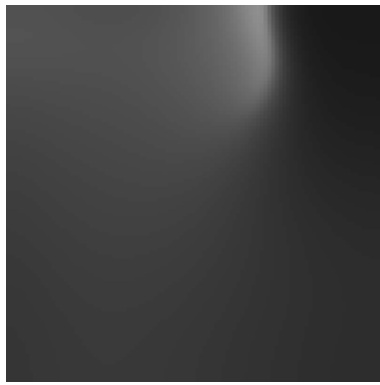

$t = 140 \text{ ms}$

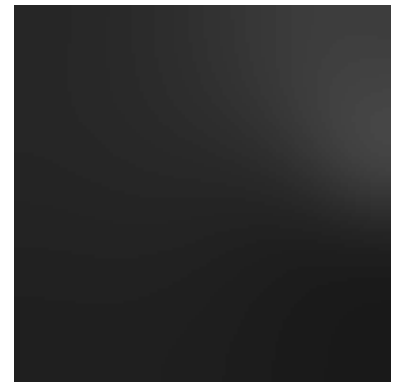

$t = 160 \text{ ms}$

**Fig. 14**

**WT**

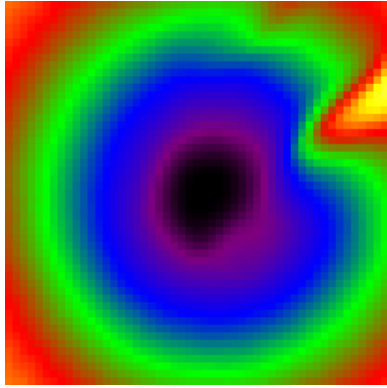

**TG**

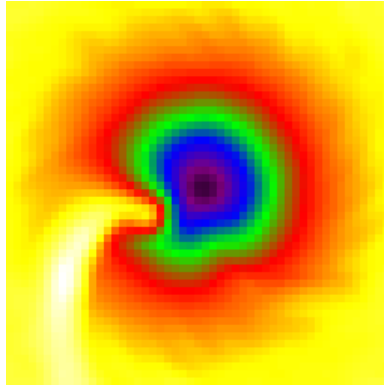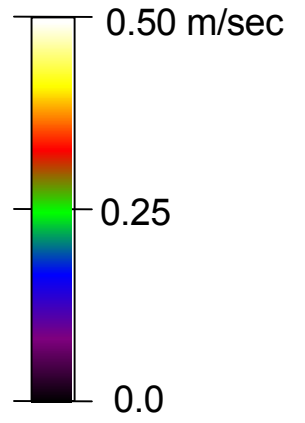

**0.5 cm**

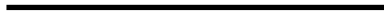

**Fig. 15**

# Simulations

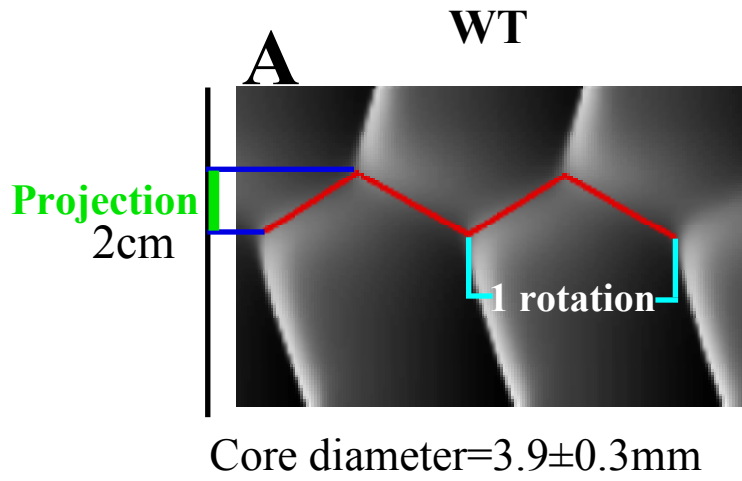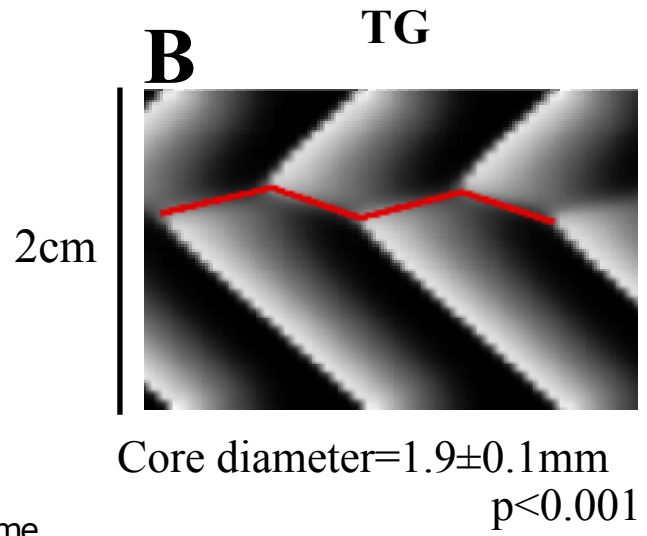

# Experiments

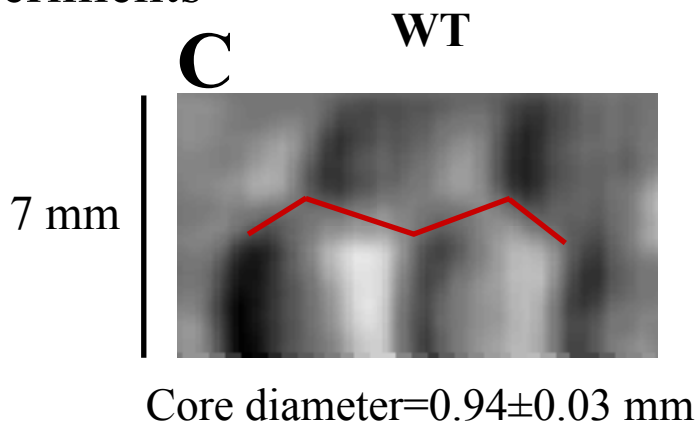

Time →

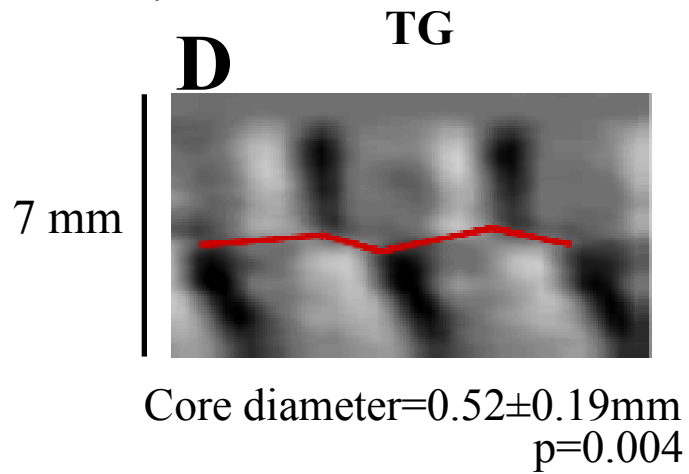

Figure 16



**A**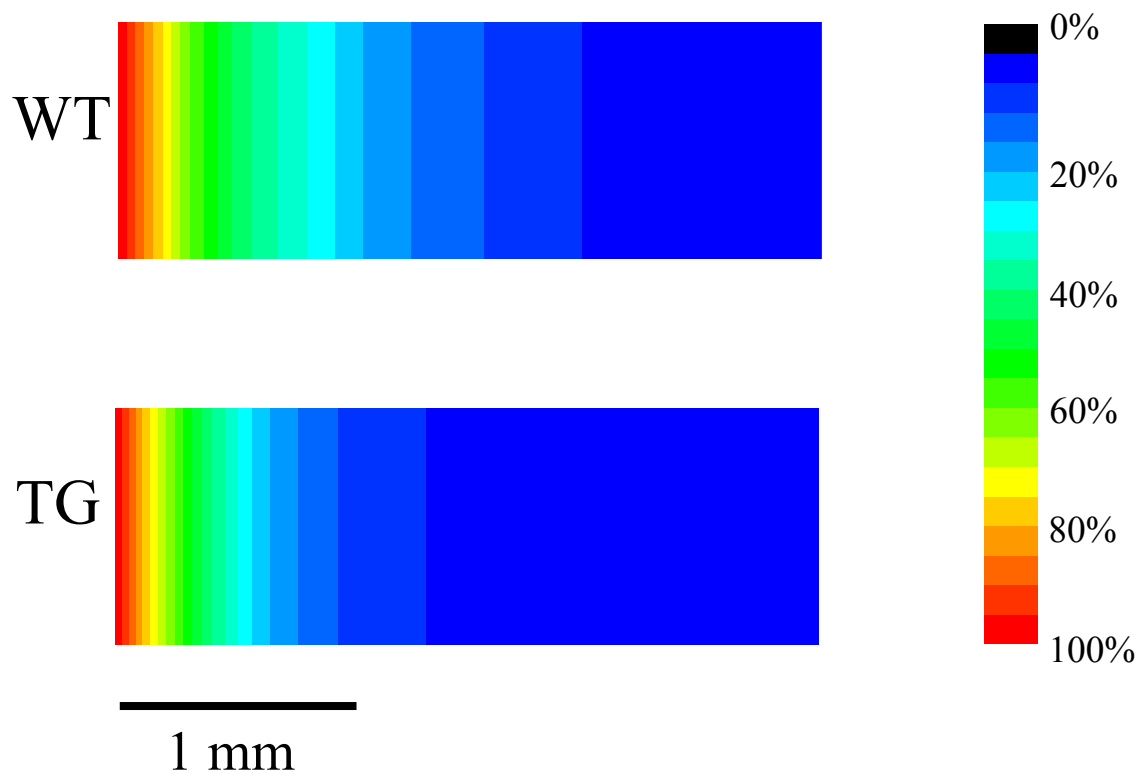**B**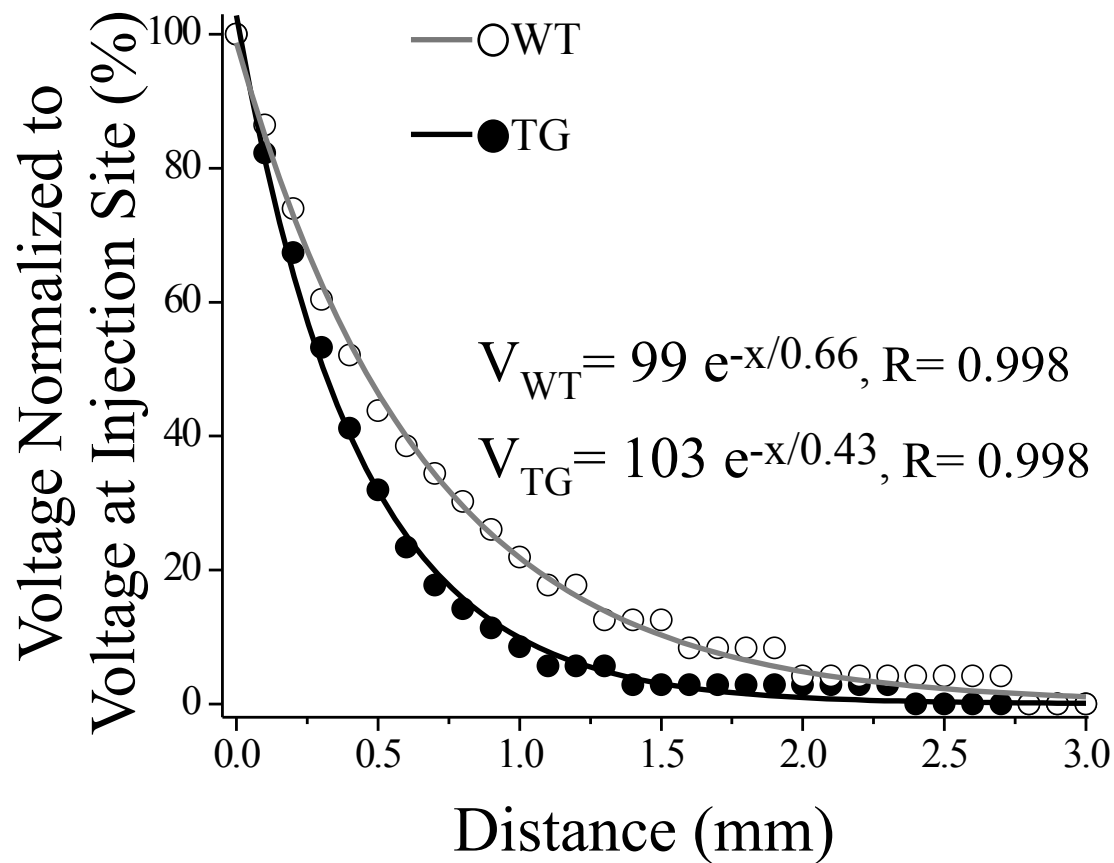**Figure 17**
